# Supplementary material for: Enteric Salmonella in humans and food in the Middle East and North Africa: protocol of a systematic review
Source: PubMed Central journal article supplement — BMJ Open. 2017 Jul 28;7(7):e017399. doi: 10.1136/bmjopen-2017-017399 (PMC5642666; doi:10.1136/bmjopen-2017-017399), 2017-07-28
Supplement: bmjopen-2017-017399.draft_revisions.pdf [file bmjopen-2017-017399.draft_revisions.pdf]

# BMJ Open

## Enteric Salmonella in humans and food in the Middle East and North Africa: Protocol of a systematic review

|                                 |                                                                                                                                                                                                                                             |
|---------------------------------|---------------------------------------------------------------------------------------------------------------------------------------------------------------------------------------------------------------------------------------------|
| Journal:                        | <i>BMJ Open</i>                                                                                                                                                                                                                             |
| Manuscript ID                   | bmjopen-2017-017399                                                                                                                                                                                                                         |
| Article Type:                   | Protocol                                                                                                                                                                                                                                    |
| Date Submitted by the Author:   | 20-Apr-2017                                                                                                                                                                                                                                 |
| Complete List of Authors:       | Chaabna, Karima; Weill Cornell Medical College – Qatar, Infectious Disease Epidemiology Group; Weill Cornell Medicine, Department of Healthcare Policy and Research<br>Alali, Walid; College of Public Health, Hamad bin Khalifa University |
| <b>Primary Subject Heading</b>: | Epidemiology                                                                                                                                                                                                                                |
| Secondary Subject Heading:      | Infectious diseases                                                                                                                                                                                                                         |
| Keywords:                       | Enteric Salmonella, Middle East and North Africa, Food born disease                                                                                                                                                                         |
|                                 |                                                                                                                                                                                                                                             |

SCHOLARONE™  
Manuscripts

1  
2  
3  
4  
5  
6 1 **Enteric *Salmonella* in humans and food in the Middle East and North Africa:**  
7 2 **Protocol of a systematic review**

8  
9 3 Karima Chaabna<sup>1,2\*</sup> and Walid Alali<sup>3</sup>

10  
11 4  
12 5  
13 6 1 Infectious Disease Epidemiology Group, Weill Cornell Medical College in Qatar, Cornell University,  
14 7 Doha, Qatar

15 8 2 Department of Healthcare Policy and Research, Weill Cornell Medical College, Cornell University,  
16 9 New York, USA

17  
18 10 3 College of Public Health, Hamad bin Khalifa University, Doha, Qatar

19  
20 11 Karima Chaabna's email: chaabnak.epi@gmail.com

21  
22 12 Walid Alali's email: walali@qf.org.qa

23  
24 13 \*Corresponding author:

25  
26 14 Karima Chaabna

27  
28 15 Address: Institute for Population Health. Weill Cornell Medicine-Qatar P.O. Box 24144, Doha, Qatar.

29  
30 16 Telephone number: +(974) 4492-8936.

31  
32 17 E-mail: chaabnak.epi@gmail.com

33  
34 18 Registration: CRD42016046360

35  
36  
37  
38  
39  
40  
41  
42  
43  
44  
45  
46  
47  
48  
49  
50  
51  
52  
53  
54  
55  
56  
57  
58  
59  
60

## 1 **Abstract**

### 2 **Introduction**

3 Nontyphoidal *Salmonella* is considered one of the leading causes of foodborne disease worldwide. This  
4 protocol provides methods that will be used to synthesize available epidemiological data on nontyphoidal  
5 enteric *Salmonella* in humans and food in Middle East and North Africa (MENA) region; and to  
6 characterize the morbidity of human salmonellosis in this region.

### 7 **Methods and analysis**

8 A systematic review will be conducted based on the Cochrane Collaboration handbook and will be  
9 reported following the items outlined in the PRISMA guidelines. We will search PubMed, Embase, CAB  
10 Direct, and Global health Library (WHO) databases in order to identify relevant reports. Additionally, the  
11 literature search will be supplemented by checking references of the included reports and the identified  
12 reviews. Furthermore, we will hand-search conference proceedings and Ministry of health's website of  
13 each country of the MENA region. We will use comprehensive search criteria with no time and no  
14 language restrictions. We will extract data on report and study characteristics, biological assay  
15 characteristics, individuals' demographic characteristics, and on primary and secondary outcomes of  
16 interest. If appropriate, meta-analysis will be conducted in order to estimate pooled prevalence measures  
17 using DerSimonian and Laird random-effects models. We will conduct meta-regression analysis to  
18 explore the effect of study-level characteristics as potential sources of heterogeneity.

### 19 **Ethics and dissemination**

20 The results of the systematic review will be disseminated in a peer-reviewed journal and presented at  
21 relevant conferences.

### 22 **Trial registration number**

23 CRD42016046360

### 24 **Keywords**

25 Enteric *Salmonella*, Middle East and North Africa  
26

## 1 Strengths and limitations of this study

- 2 • To the best of our knowledge, this is the first systematic review evaluating the epidemiology of  
3 nontyphoidal enteric *Salmonella* in humans and food in the countries of the Middle East and  
4 North Africa region.
- 5 • This systematic review will potentially inform policy makers in order to strengthen national  
6 foodborne disease surveillance and to improve food safety in this region.
- 7 • One of our limitations will be probably a high heterogeneity between studies related to sample  
8 size, populations, settings, study periods, and the use of different biological assays to ascertain the  
9 infection.

## 1 Introduction

2 Nontyphoidal *Salmonella* is considered one of the leading causes of foodborne disease worldwide. The  
3 World Health Organization (WHO) estimated that the annual median number of nontyphoidal  
4 salmonellosis was 78.7 million foodborne illnesses with over 59 thousand deaths <sup>1</sup>. As for the WHO  
5 defined Eastern Mediterranean Region, the median incidence rate of nontyphoidal salmonellosis was  
6 1,610 illnesses with 0.6 death, and 54 disability adjusted life years (DALYS) per 100,000 persons;  
7 whereas, the median incidence rate in the WHO defined African Region is 896 illnesses with 1 death, and  
8 89 DALYS per 100,000 persons <sup>2</sup>. In the United States alone, an estimated 1.03 million illnesses, 19,500  
9 hospitalizations, and 378 deaths are caused by nontyphoidal *Salmonella* annually <sup>3</sup>.

10 Countries in the Middle East and North Africa (MENA) region share similar heritage, religion and  
11 language. However, the socioeconomic status, governance, growth and development, and health care  
12 system in MENA region differ widely. Although foodborne disease outbreaks have been frequently  
13 reported in MENA region, a rigorous reporting and monitoring system (i.e., active surveillance system) is  
14 lacking to quantify the incidence/prevalence of foodborne pathogens and disease. Nonetheless, published  
15 studies from the MENA region have reported data on foodborne disease morbidity in human populations.  
16 Furthermore, data on the prevalence of food contaminants have been revealed in MENA countries.  
17 Nontyphoidal *Salmonella* species are common cause of foodborne disease in the MENA region<sup>1</sup>.  
18 Moreover, *Salmonella* has been detected in an array of food products presented to consumers in the  
19 region. The number and quality of the studies differ substantially by country. To the best of our  
20 knowledge, there has been no published study that systematically reviewed, synthesized, and assessed the  
21 available data on nontyphoidal enteric *Salmonella* in humans and food in the MENA region. Synthesizing  
22 the data in addition to characterizing the morbidity of human salmonellosis in MENA will provide a  
23 rational basis for sources attribution studies at regional and country level. Additionally, this study will  
24 inform policy maker in order to strengthen national foodborne disease surveillance, improve food safety,  
25 and prioritize food control intervention programs.

## 26 Objectives

27 The proposed systematic review will identify, synthesize, and assess the available data on nontyphoidal  
28 enteric *Salmonella* in humans and food in each country of the MENA region. Therefore, our review will  
29 address the following questions: 1) What is the nontyphoidal salmonellosis morbidity in human  
30 populations in MENA?, 2) What is the nontyphoidal *Salmonella* prevalence in food in MENA?, 3) What  
31 is the distribution of *Salmonella* serotypes in human populations and food?

## 1 **Methods and analysis**

2 This systematic review protocol was developed based on the Cochrane Collaboration handbook<sup>4</sup> and  
3 reported following the statement outlined by Preferred Reporting Items for Systematic Review and Meta-  
4 Analysis Protocols (PRISMA-P) 2015 statements<sup>5</sup>. PRISMA-P 2015 checklist<sup>6</sup> was completed and can  
5 be found in Table 1.

## 6 **Inclusion and exclusion criteria**

### 7 *Types of studies*

8 All reports meeting the inclusion criteria will be included if the study sample size is higher than ten. Case  
9 reports, case series, expert opinion, reviews, original articles reporting qualitative and experimental  
10 studies, editorials, commentaries, letters to editors, author replies, and newspaper articles will be  
11 excluded.

### 12 *Type of participants*

13 Included reports are those studying humans and food. Reports will be excluded if the studies were on  
14 enteric *Salmonella* in live food producing or domestic animals as well as in water, fomite, soil, or other  
15 environments.

### 16 *Types of exposures*

17 Included reports are those studying nontyphoidal enteric *Salmonella*. These reports need to present studies  
18 that used laboratory testing for *Salmonella* ascertainment. More precisely, in humans, the laboratory  
19 testing have to be conducted on stool samples; i.e., reports of studies based on clinical diagnosis without  
20 any laboratory tests on stool to confirm the causative agent will be excluded. Therefore, reports on  
21 nontyphoidal enteric *Salmonella* from gastro-intestinal tract infections will be included; while reports on  
22 respiratory, urinary tract, and bloodstream infections will be excluded. Additionally, studies on  
23 nontyphoidal enteric *Salmonella* cultured from cerebrospinal fluid will be excluded. Reports referring to  
24 nontyphoidal enteric *Salmonella* infection as *Salmonella* infection or as salmonellosis will be included;  
25 whereas, those referring to enteric *Salmonella* as typhoidal, paratyphoidal, or invasive nontyphoidal  
26 *Salmonella* infection (that is not foodborne or cause of gastro-intestinal tract infections) will be excluded.

### 27 **Types of outcomes**

28 Our primary outcomes are nontyphoidal enteric *Salmonella* morbidity (prevalence), serotype distribution,  
29 bacteria attributable mortality and all-cause mortality in human populations, hospitalization, and length of  
30 stay in hospital. Our secondary outcomes are enteric *Salmonella* prevalence and serotype distribution in  
31 food.

## 1 **Data sources and search strategy**

2 Our systematic review will be conducted based on the Cochrane Collaboration handbook <sup>4</sup> and will be  
3 reported following the items outlined in the Preferred Reporting Items for Systematic Reviews and Meta-  
4 Analyses (PRISMA) statement. We will search PubMed <sup>7</sup>, Embase <sup>8</sup>, CAB Direct <sup>9</sup>, and Global health  
5 Library (WHO) <sup>10</sup> databases in order to identify further relevant reports. In addition, the literature search  
6 will be supplemented by checking references of the included reports and the identified reviews.  
7 Furthermore, we will hand-search conference proceedings and Ministry of health's website of each  
8 country of the MENA region. We will use comprehensive search criteria with no time and no language  
9 restrictions. We will construct our search criteria using Boolean logic (OR and AND) to combine Medical  
10 Subject Headings (MeSH) terms and text words. Key search terms will include countries' names, MENA  
11 populations' names, and *Salmonella*. We will use WHO/EMR <sup>11</sup> definition of MENA region and we will  
12 complement this list with four countries whose official languages are Arabic <sup>12</sup> and that are cited in other  
13 definitions of MENA <sup>13-15</sup>. The reviewer team do not speak the official language of Cyprus <sup>12</sup> nor the  
14 media of instruction in its Universities and Colleges <sup>16</sup>; this will prevent us to identify grey literature such  
15 as reports from the ministry of health, journal articles and conference abstract published in these  
16 languages. As such, we decide to exclude this country. Our systematic review will include 24 countries,  
17 namely: Afghanistan, Algeria, Bahrain, Djibouti, Egypt, Iran, Iraq, Jordan, Kuwait, Lebanon, Libya,  
18 Morocco, Mauritania, Oman, Pakistan, Palestine, Qatar, Saudi Arabia, Somalia, Sudan, Syria, Tunisia,  
19 United Arab Emirates, and Yemen. The selected MENA countries have a total population of more than  
20 680 million people <sup>17</sup>.

## 21 **Study records**

### 22 *Selection process*

23 Identified references will be imported into a reference manager (Endnote <sup>18</sup>) where duplicate reports will  
24 be excluded. The title and abstract screening for relevance, followed by the full-text screening of the  
25 unique reports will be conducted by KC. This multi-level screening process will be checked by WA. Any  
26 disagreements will be resolved by discussion and consensus. Non-eligible reports will be excluded and  
27 the reasons for their exclusion will be recorded.

### 28 *Data collection process*

29 A piloted standardized form developed in Microsoft Excel 2010 <sup>19</sup> by KC and WA will be used for the  
30 extraction step. Extraction of relevant data will be done by KC and 25% of the data will be checked for  
31 correctness by WA.

## 1 **Data items**

2 We will extract data on report characteristics (authors, year of publication, title, among others), study  
3 characteristics (year of data collection, study site and design, sampling methodology, prevalence, number  
4 of positive cases, sample size, among others), biological assay characteristics, individuals' demographic  
5 characteristics (age, gender, among others), and on primary and secondary outcomes of interest.

## 6 **Risk of bias in individual studies**

7 Based on the Cochrane approach<sup>4</sup>, the risk of bias (ROB) assessment will be conducted at both the study-  
8 level and the outcome-level. Each study will be classified as having a low, high, or unclear ROB in each  
9 of the three quality domains, namely sampling methodology, infection ascertainment, and response rate.  
10 A ROB will be considered low if these three quality domains are probability-based, ascertainment by  
11 biological assays, or response rate is  $\geq 80\%$ , respectively. At outcome-level, a minimum sample size will  
12 be calculated using exact binomial confidence interval formula<sup>20</sup> in order to differentiate outcome  
13 measures with good precision. Sample size of studies considered as having good precision should be  
14 equal or higher than the minimum sample size defined in this protocol.

## 15 **Data synthesis**

16 We will report our systematic review following Preferred Reporting Items for PRISMA 2009 statements  
17<sup>21</sup> and PRISMA for Abstracts Checklist<sup>22</sup>. We will qualitatively synthesize the identified data on  
18 nontyphoidal enteric *Salmonella* in humans and food. These data will be stratified by country and  
19 according to the clinical status of the study populations:

- 20 1- Non-clinical populations in community settings: healthy populations, mainly food workers
- 21 2- Clinical populations: patients with diarrhea due to gastrointestinal pathogenic microbes

22 In addition, a third stratum will be created for the food category. According to the diversity of the  
23 identified population subgroups, we will decide if we also need to create subcategories in each stratum.

24 If data are appropriate for quantitative synthesis, data analyses will be conducted in R v.3.1.1.<sup>23</sup> using the  
25 *meta*<sup>24</sup> and *metafor*<sup>25</sup> packages. Using meta-analysis, we aim to estimate pooled prevalence of  
26 *Salmonella* in food (stratified by category: poultry, beef, and seafood, among others) and in human  
27 (stratified by type of population). Outcome measures will be pooled in all strata with at least three  
28 outcome measures included. Meta-regression will be used in order to assess heterogeneity across studies<sup>4</sup>  
29 related to sample size, populations, settings, study periods, and the use of different biological assays to  
30 ascertain the infection. Additionally, we will conduct sensitivity analysis restricted to studies at low ROB  
31 in order to explore the impact of high ROB study measures on the pooled estimates.



## Meta-bias

Regarding meta-bias assessment, we will use funnel plots in order to explore small-study effect on the pooled estimates<sup>26</sup>. Traditional funnel plots (log (odds proportion) vs. 1/standard error) are inaccurate for meta-analysis of proportion studies. Therefore, we will create funnel plots of log (odds proportion) against sample size<sup>27</sup>. In order to test the asymmetry of the funnel, we will perform Egger test<sup>26</sup> that is based on standard error as well as Peter test which is based on sample size<sup>27 28</sup>.

## Confidence in cumulative evidence

We will use a narrative justification for the quality of the evidence at the country-level. We will consider the quality of evidence being better in a country if at least one country-level study was conducted. This country-level study should have used standard methodology including probability-based sampling. Thus, we will categorize countries as having:

- No evidence: no data identified
- Poor evidence: poor quality of the outcome measures
- Limited evidence: the number of outcome measures is small but of reasonable quality
- Good evidence: the number of outcome measures is small but with good quality
- Conclusive evidence: enough outcome measures with good quality

## Discussion

To the best of our knowledge, this systematic review will be the first attempt to synthesize available data on nontyphoidal enteric *Salmonella* in humans and food in the countries of the MENA region; and to characterize the morbidity of human salmonellosis. This work will enable us to identify key pathogen control points that should be reinforced and those that need to be further assessed through country-level studies. Ultimately, this systematic review will provide rational basis for sources attribution studies at both regional and country levels. Additionally, this study will inform policy maker actions in order to strengthen national foodborne disease surveillance and to improve food safety and public health in MENA.

## Ethics and dissemination

Ethical approval will not be needed as in this systematic review, data used will not be individual patient data. Therefore, there will be no concerns about privacy. The findings will be disseminated via publication of a manuscript in a peer-reviewed journal and presented at relevant conferences.

1  
2  
3 **1 Author contributions:**  
4

5 2 KC and WA contributed to the conception of the study. The manuscript protocol was drafted by KC and  
6  
7 3 revised by WA. The search strategy was developed and will be conducted by both authors who will also  
8  
9 4 screen the potential reports, extract data, assess the risk of bias and perform the data synthesis. Both  
10  
11 5 authors approved the publication of the current protocol.

12  
13 **6 Funding statement**

14 7 This research received no specific grant from any funding agency in the public, commercial, or not-for-  
15  
16 8 profit sectors'.  
17  
18  
19  
20  
21  
22  
23  
24  
25  
26  
27  
28  
29  
30  
31  
32  
33  
34  
35  
36  
37  
38  
39  
40  
41  
42  
43  
44  
45  
46  
47  
48  
49  
50  
51  
52  
53  
54  
55  
56  
57  
58  
59  
60

1  
2  
3  
4  
5  
6  
7  
8  
9  
10  
11  
12  
13  
14  
15  
16  
17  
18  
19  
20  
21  
22  
23  
24  
25  
26  
27  
28  
29  
30  
31  
32  
33  
34  
35  
36  
37  
38  
39  
40  
41  
42  
43  
44  
45  
46  
47  
48  
49  
1 Table 1: PRISMA-P (Preferred Reporting Items for Systematic review and Meta-Analysis Protocols) 2015 checklist

| Section and topic                 | Item<br>N <sub>0</sub> | Checklist items                                                                                                                                                                                | page           |
|-----------------------------------|------------------------|------------------------------------------------------------------------------------------------------------------------------------------------------------------------------------------------|----------------|
| <b>Administrative information</b> |                        |                                                                                                                                                                                                |                |
| Title                             |                        |                                                                                                                                                                                                |                |
| Identification                    | 1a                     | Identify the report as a protocol of a systematic review                                                                                                                                       | 1              |
| Update                            | 1b                     | If the protocol is for an update of a previous systematic review, identify                                                                                                                     | Not applicable |
| Registration                      | 2                      | If registered, provide the name of the registry (such PROSPERO) and registration number                                                                                                        | 1              |
| Authors:                          |                        |                                                                                                                                                                                                | 1              |
| Contact                           | 3a                     | Provide name, institutional, e-mail address of all protocol authors, provide physical mailing address of the corresponding author                                                              | 1              |
| Contributions                     | 3b                     | Describe contributions of protocol authors and identity the guarantor of the review                                                                                                            | 9              |
| Amendments                        | 4                      | If the protocol represents an amendment of a previously completed or published protocol, identify as such and list changes; otherwise state plan for documenting important protocol amendments | Not applicable |
| Support:                          |                        |                                                                                                                                                                                                |                |
| Sources                           | 5a                     | Indicate sources of financial or other support for the review                                                                                                                                  | 9              |
| Sponsor                           | 5b                     | Provide name for the review funder and/or sponsor                                                                                                                                              | 9              |
| Role of sponsor or funder         | 5c                     | Describe roles of funder(s), sponsor(s), if any, in developing the protocol                                                                                                                    | 9              |

**Introduction**

|            |   |                                                                                                                                                          |   |
|------------|---|----------------------------------------------------------------------------------------------------------------------------------------------------------|---|
| Rationale  | 6 | Describe the rationale for the review in the context of what is already known                                                                            | 4 |
| Objectives | 7 | Provide an explicit statement of the question(s) the review will address with reference to participants, interventions, comparators, and outcomes (PICO) | 4 |

**Methods**

|                             |     |                                                                                                                                                                                                                               |     |
|-----------------------------|-----|-------------------------------------------------------------------------------------------------------------------------------------------------------------------------------------------------------------------------------|-----|
| Eligibility criteria        | 8   | Specify the study characteristics (such as PICO, study design, setting, time frame) and report characteristics (such as years considered, language, publication status) to be used as criteria for eligibility for the review | 5   |
| Information sources         | 9   | Describe all intended information sources (such as electronic databases, contact with study authors, trial registers, or other grey literature sources) with planned dates of coverage                                        | 6   |
| Search strategy             | 10  | Present draft of search strategy to be used for at least one electronic databases, including planned limits, such that it could be repeated                                                                                   | 6   |
| Study records:              |     |                                                                                                                                                                                                                               |     |
| Data management             | 11a | Describe the mechanism(s) that will be used to manage records and data throughout the review                                                                                                                                  | 6-7 |
| Selection process           | 11b | State the process that will be used for selecting studies ( such as two independent reviewers) through each phase of the review ( that is, screening, eligibility, and inclusion in meta-analysis)                            | 6   |
| Data collection process     | 11c | Describe planned method of extracting data from reports (such as piloting forms, done independently, in duplicate), any processes for obtaining and confirming data from investigators                                        | 6   |
| Data items                  | 12  | List and define all variables for which data will be sought (such as PICO items, funding sources), any pre-planned data assumptions and simplifications                                                                       | 7   |
| Outcomes and prioritization | 13  | List and define all outcomes for which data will be sought, including prioritization of main and additional outcomes, with rationale                                                                                          | 5   |

|    |                     |     |                                                                                                      |   |
|----|---------------------|-----|------------------------------------------------------------------------------------------------------|---|
| 1  |                     |     |                                                                                                      |   |
| 2  |                     |     |                                                                                                      |   |
| 3  | Risk of bias in     | 141 | Describe anticipated methods for assessing risk of bias of individual studies, including whether     | 7 |
| 4  | individual studies  |     | this will be done at the outcome or study level, or both; state how this information will be used in |   |
| 5  |                     |     | data synthesis                                                                                       |   |
| 6  |                     |     |                                                                                                      |   |
| 7  | Data synthesis      | 15a | Describe criteria under which study data will be quantitatively synthesised                          | 7 |
| 8  |                     |     |                                                                                                      |   |
| 9  |                     | 15b | If data are appropriate for quantitative synthesis, describe planned summary measures, methods       |   |
| 10 |                     |     | of handling data and methods of combining data from studies, including any planned exploration       |   |
| 11 |                     |     | of consistency (such as I <sup>2</sup> , Kendall's $\tau$ )                                          |   |
| 12 |                     |     |                                                                                                      |   |
| 13 |                     | 15c | Describe any proposed additional analyses (such as sensitivity or subgroup analyses, meta-           |   |
| 14 |                     |     | regression)                                                                                          |   |
| 15 |                     | 15d | If quantitative synthesis is not appropriate, describe the type of summary planned                   |   |
| 16 |                     |     |                                                                                                      |   |
| 17 |                     |     |                                                                                                      |   |
| 18 |                     | 15d |                                                                                                      |   |
| 19 |                     |     |                                                                                                      |   |
| 20 | Meta-bias(es)       | 16  | Specify any planned assessment of meta-bias(es) (such as publication bias across studies,            | 8 |
| 21 |                     |     | selective reporting within studies)                                                                  |   |
| 22 |                     |     |                                                                                                      |   |
| 23 | Confidence in       | 17  | Describe how the strength of the body of evidence will be assessed (such as GRADE)                   | 8 |
| 24 | cumulative evidence |     |                                                                                                      |   |
| 25 |                     |     |                                                                                                      |   |
| 26 |                     |     |                                                                                                      |   |
| 27 |                     |     |                                                                                                      |   |
| 28 |                     |     |                                                                                                      |   |
| 29 |                     |     |                                                                                                      |   |
| 30 |                     |     |                                                                                                      |   |
| 31 |                     |     |                                                                                                      |   |
| 32 |                     |     |                                                                                                      |   |
| 33 |                     |     |                                                                                                      |   |
| 34 |                     |     |                                                                                                      |   |
| 35 |                     |     |                                                                                                      |   |
| 36 |                     |     |                                                                                                      |   |
| 37 |                     |     |                                                                                                      |   |
| 38 |                     |     |                                                                                                      |   |
| 39 |                     |     |                                                                                                      |   |
| 40 |                     |     |                                                                                                      |   |
| 41 |                     |     |                                                                                                      |   |
| 42 |                     |     |                                                                                                      |   |
| 43 |                     |     |                                                                                                      |   |
| 44 |                     |     |                                                                                                      |   |
| 45 |                     |     |                                                                                                      |   |
| 46 |                     |     |                                                                                                      |   |
| 47 |                     |     |                                                                                                      |   |
| 48 |                     |     |                                                                                                      |   |
| 49 |                     |     |                                                                                                      |   |

## Reference

1. Havelaar AH, Kirk MD, Torgerson PR, et al. World Health Organization Global Estimates and Regional Comparisons of the Burden of Foodborne Disease in 2010. *PLoS medicine* 2015;12(12):e1001923. doi: 10.1371/journal.pmed.1001923
2. Kirk MD, Pires SM, Black RE, et al. World Health Organization Estimates of the Global and Regional Disease Burden of 22 Foodborne Bacterial, Protozoal, and Viral Diseases, 2010: A Data Synthesis. *PLoS medicine* 2015;12(12):e1001921. doi: 10.1371/journal.pmed.1001921
3. Scallan E, Hoekstra RM, Angulo FJ, et al. Foodborne illness acquired in the United States--major pathogens. *Emerging infectious diseases* 2011;17(1):7-15. doi: 10.3201/eid1701.P11101
4. Higgins JPT, Green S. Cochrane Handbook for Systematic Reviews of Interventions 2008.
5. Moher D, Shamseer L, Clarke M, et al. Preferred reporting items for systematic review and meta-analysis protocols (PRISMA-P) 2015 statement. *Systematic reviews* 2015;4:1. doi: 10.1186/2046-4053-4-1
6. Shamseer L, Moher D, Clarke M, et al. Preferred reporting items for systematic review and meta-analysis protocols (PRISMA-P) 2015: elaboration and explanation. *BMJ* 2015;349:g7647. doi: 10.1136/bmj.g7647
7. National institutes of Health. PubMed.gov US National Library of Medicine. Available at: <http://www.ncbi.nlm.nih.gov/pubmed>. Bethesda, USA.N.D. [
8. Ovid Technologies i. Emabase New York, USA2016 [Available from: <http://ovidsp.tx.ovid.com/sp-3.21.1b/ovidweb.cgi?&S=GLEEFPGFJDDNDAFNCKMHCJCKEAA00&New+Database=Single%7c6> accessed February 15 2017.
9. CAB International. CAB Direct United Kingdom2016 [Available from: <https://www.cabdirect.org/> accessed December 25 2016.
10. World Health Organization. Global Health Library Geneva, SwitzerlandN.D. [Available from: <http://www.globalhealthlibrary.net/php/index.php> accessed January 1 2017.
11. World Health Organization. Country groupings: Subregional country groupings for the global assessment of disease burden: WHO; N.D. [Available from: [http://www.who.int/quantifying\\_ehimpacts/global/ebdcountgroup/en/](http://www.who.int/quantifying_ehimpacts/global/ebdcountgroup/en/) accessed January 25 2017.
12. The Central Intelligence Agency. The World Factbook: The Central Intelligence Agency; 2017 [Available from: <https://www.cia.gov/library/publications/the-world-factbook/> accessed 26 January 2017.
13. The World Bank. Data: Wold Bank Country and Lending Groups: The World Bank; 2017 [Available from: <https://datahelpdesk.worldbank.org/knowledgebase/articles/906519-world-bank-country-and-lending-groups> accessed July 25 2017.

14. UNAIDS. UNAIDS Middle East & North Africa: UNAIDS; 2017 [Available from: <http://www.unaidsmena.org/> accessed 01/25 2017.
15. Institute for Health Metrics and Evaluation GBD Compare | Viz Hub: University of Washington; 2017 [Available from: <http://vizhub.healthdata.org/gbd-compare/> accessed February 15 2017.
16. Conseil de L'Europe. Language Education Policy Profile: Cyprus: Conseil de L'Europe, N.D.
17. United Nations. Total Population - Both Sexes. De facto population in a country, area or region as of 1 July of the year indicated. Figures are presented in thousands. World Population Prospects: The 2015 Revision 2016 [Available from: <https://esa.un.org/unpd/wpp/Download/Standard/Population/> accessed January 1 2017.
18. Thomson Reuter. Endnote X7 2016 [
19. Microsoft. Microsoft Excel 2010 2010
20. Clopper C, Pearson E. The use of confidence or fiducial limits illustrated in the case of the binomial. *Biometricka* 1934;26:404-13.
21. Moher D, Liberati A, Tetzlaff J, et al. Preferred reporting items for systematic reviews and meta-analyses: the PRISMA statement. *Journal of clinical epidemiology* 2009;62(10):1006-12. doi: 10.1016/j.jclinepi.2009.06.005 [published Online First: 2009/07/28]
22. Beller EM, Glasziou PP, Altman DG, et al. PRISMA for Abstracts: reporting systematic reviews in journal and conference abstracts. *PLoS medicine* 2013;10(4):e1001419. doi: 10.1371/journal.pmed.1001419
23. The R Project for Statistical Computing. R-3.3.1 for Windows (32/64 bit): The R Foundation.; 2016 [Available from: <https://cran.r-project.org/bin/windows/base/> accessed August 30.
24. Schwarzer G. Meta package 2016 [Available from: <https://cran.r-project.org/web/packages/meta/meta.pdf> accessed August 30 2016.
25. Schwarzer G. Metafor package 2015 [Available from: <https://cran.r-project.org/web/packages/metafor/metafor.pdf> accessed August 30 2016.
26. Sterne JA, Egger M. Funnel plots for detecting bias in meta-analysis: guidelines on choice of axis. *Journal of clinical epidemiology* 2001;54(10):1046-55. [published Online First: 2001/09/29]
27. Hunter JP, Saratzis A, Sutton AJ, et al. In meta-analyses of proportion studies, funnel plots were found to be an inaccurate method of assessing publication bias. *Journal of clinical epidemiology* 2014;67(8):897-903. doi: 10.1016/j.jclinepi.2014.03.003 [published Online First: 2014/05/06]
28. Moreno SG, Sutton AJ, Ades AE, et al. Assessment of regression-based methods to adjust for publication bias through a comprehensive simulation study. *BMC medical research methodology* 2009;9:2. doi: 10.1186/1471-2288-9-2 [published Online First: 2009/01/14]

Table 1: PRISMA-P (Preferred Reporting Items for Systematic review and Meta-Analysis Protocols) 2015 checklist

| Section and topic                 | Item           | Checklist items                                                                                                                                                                                                               | page           |
|-----------------------------------|----------------|-------------------------------------------------------------------------------------------------------------------------------------------------------------------------------------------------------------------------------|----------------|
|                                   | N <sub>0</sub> |                                                                                                                                                                                                                               |                |
| <b>Administrative information</b> |                |                                                                                                                                                                                                                               |                |
| Title                             |                |                                                                                                                                                                                                                               |                |
| Identification                    | 1a             | Identify the report as a protocol of a systematic review                                                                                                                                                                      | 1              |
| Update                            | 1b             | If the protocol is for an update of a previous systematic review, identify                                                                                                                                                    | Not applicable |
| Registration                      | 2              | If registered, provide the name of the registry (such PROSPERO) and registration number                                                                                                                                       | 1              |
| Authors:                          |                |                                                                                                                                                                                                                               | 1              |
| Contact                           | 3a             | Provide name, institutional, e-mail address of all protocol authors, provide physical mailing address of the corresponding author                                                                                             | 1              |
| Contributions                     | 3b             | Describe contributions of protocol authors and identity the guarantor of the review                                                                                                                                           | 9              |
| Amendments                        | 4              | If the protocol represents an amendment of a previously completed or published protocol, identify as such and list changes; otherwise state plan for documenting important protocol amendments                                | Not applicable |
| Support:                          |                |                                                                                                                                                                                                                               |                |
| Sources                           | 5a             | Indicate sources of financial or other support for the review                                                                                                                                                                 | 9              |
| Sponsor                           | 5b             | Provide name for the review funder and/or sponsor                                                                                                                                                                             | 9              |
| Role of sponsor or funder         | 5c             | Describe roles of funder(s), sponsor(s), if any, in developing the protocol                                                                                                                                                   | 9              |
| <b>Introduction</b>               |                |                                                                                                                                                                                                                               |                |
| Rationale                         | 6              | Describe the rationale for the review in the context of what is already known                                                                                                                                                 | 4              |
| Objectives                        | 7              | Provide an explicit statement of the question(s) the review will address with reference to participants, interventions, comparators, and outcomes (PICO)                                                                      | 4              |
| <b>Methods</b>                    |                |                                                                                                                                                                                                                               |                |
| Eligibility criteria              | 8              | Specify the study characteristics (such as PICO, study design, setting, time frame) and report characteristics (such as years considered, language, publication status) to be used as criteria for eligibility for the review | 5              |
| Information sources               | 9              | Describe all intended information sources (such as electronic databases, contact with study authors, trial registers, or other grey literature sources) with planned dates of coverage                                        | 6              |
| Search strategy                   | 10             | Present draft of search strategy to be used for at least one electronic databases, including planned limits, such that it could be repeated                                                                                   | 6              |
| Study records:                    |                |                                                                                                                                                                                                                               |                |
| Data management                   | 11a            | Describe the mechanism(s) that will be used to manage records and data throughout the review                                                                                                                                  | 6-7            |
| Selection process                 | 11b            | State the process that will be used for selecting studies ( such as two independent reviewers)                                                                                                                                | 6              |



|    |                         |     |                                                                                                                                                                                              |   |
|----|-------------------------|-----|----------------------------------------------------------------------------------------------------------------------------------------------------------------------------------------------|---|
| 1  |                         |     |                                                                                                                                                                                              |   |
| 2  |                         |     |                                                                                                                                                                                              |   |
| 3  |                         |     |                                                                                                                                                                                              |   |
| 4  | Data collection process | 11c | through each phase of the review ( that is, screening, eligibility, and inclusion in meta-analysis)<br>Describe planned method of extracting data from reports (such as piloting forms, done | 6 |
| 5  |                         |     | independently, in duplicate), any processes for obtaining and confirming data from investigators                                                                                             |   |
| 6  | Data items              | 12  | List and define all variables for which data will be sought (such as PICO items, funding sources),                                                                                           | 7 |
| 7  |                         |     | any pre-planned data assumptions and simplifications                                                                                                                                         |   |
| 8  | Outcomes and            | 13  | List and define all outcomes for which data will be sought, including prioritization of main and                                                                                             | 5 |
| 9  | prioritization          |     | additional outcomes, with rationale                                                                                                                                                          |   |
| 10 | Risk of bias in         | 141 | Describe anticipated methods for assessing risk of bias of individual studies, including whether                                                                                             | 7 |
| 11 | individual studies      |     | this will be done at the outcome or study level, or both; state how this information will be used in                                                                                         |   |
| 12 |                         |     | data synthesis                                                                                                                                                                               |   |
| 13 | Data synthesis          | 15a | Describe criteria under which study data will be quantitatively synthesised                                                                                                                  | 7 |
| 14 |                         | 15b | If data are appropriate for quantitative synthesis, describe planned summary measures, methods                                                                                               |   |
| 15 |                         |     | of handling data and methods of combining data from studies, including any planned exploration                                                                                               |   |
| 16 |                         |     | of consistency (such as I <sup>2</sup> , Kendall's $\tau$ )                                                                                                                                  |   |
| 17 |                         | 15c | 15c Describe any proposed additional analyses (such as sensitivity or subgroup analyses, meta-                                                                                               |   |
| 18 |                         |     | regression)                                                                                                                                                                                  |   |
| 19 |                         | 15d | 15d If quantitative synthesis is not appropriate, describe the type of summary planned                                                                                                       |   |
| 20 | Meta-bias(es)           | 16  | Specify any planned assessment of meta-bias(es) (such as publication bias across studies,                                                                                                    | 8 |
| 21 |                         |     | selective reporting within studies)                                                                                                                                                          |   |
| 22 | Confidence in           | 17  | Describe how the strength of the body of evidence will be assessed (such as GRADE)                                                                                                           | 8 |
| 23 | cumulative evidence     |     |                                                                                                                                                                                              |   |
| 24 |                         |     |                                                                                                                                                                                              |   |
| 25 |                         |     |                                                                                                                                                                                              |   |
| 26 |                         |     |                                                                                                                                                                                              |   |
| 27 |                         |     |                                                                                                                                                                                              |   |
| 28 |                         |     |                                                                                                                                                                                              |   |
| 29 |                         |     |                                                                                                                                                                                              |   |
| 30 |                         |     |                                                                                                                                                                                              |   |
| 31 |                         |     |                                                                                                                                                                                              |   |
| 32 |                         |     |                                                                                                                                                                                              |   |
| 33 |                         |     |                                                                                                                                                                                              |   |
| 34 |                         |     |                                                                                                                                                                                              |   |
| 35 |                         |     |                                                                                                                                                                                              |   |
| 36 |                         |     |                                                                                                                                                                                              |   |
| 37 |                         |     |                                                                                                                                                                                              |   |
| 38 |                         |     |                                                                                                                                                                                              |   |
| 39 |                         |     |                                                                                                                                                                                              |   |
| 40 |                         |     |                                                                                                                                                                                              |   |
| 41 |                         |     |                                                                                                                                                                                              |   |
| 42 |                         |     |                                                                                                                                                                                              |   |
| 43 |                         |     |                                                                                                                                                                                              |   |
| 44 |                         |     |                                                                                                                                                                                              |   |
| 45 |                         |     |                                                                                                                                                                                              |   |
| 46 |                         |     |                                                                                                                                                                                              |   |
| 47 |                         |     |                                                                                                                                                                                              |   |
| 48 |                         |     |                                                                                                                                                                                              |   |
| 49 |                         |     |                                                                                                                                                                                              |   |

# BMJ Open

## Enteric Salmonella in humans and food in the Middle East and North Africa: Protocol of a systematic review

|                                 |                                                                                                                                                                                                                                             |
|---------------------------------|---------------------------------------------------------------------------------------------------------------------------------------------------------------------------------------------------------------------------------------------|
| Journal:                        | <i>BMJ Open</i>                                                                                                                                                                                                                             |
| Manuscript ID                   | bmjopen-2017-017399.R1                                                                                                                                                                                                                      |
| Article Type:                   | Protocol                                                                                                                                                                                                                                    |
| Date Submitted by the Author:   | 01-Jun-2017                                                                                                                                                                                                                                 |
| Complete List of Authors:       | Chaabna, Karima; Weill Cornell Medical College – Qatar, Infectious Disease Epidemiology Group; Weill Cornell Medicine, Department of Healthcare Policy and Research<br>Alali, Walid; College of Public Health, Hamad bin Khalifa University |
| <b>Primary Subject Heading</b>: | Epidemiology                                                                                                                                                                                                                                |
| Secondary Subject Heading:      | Infectious diseases                                                                                                                                                                                                                         |
| Keywords:                       | Enteric Salmonella, Middle East and North Africa, Food born disease                                                                                                                                                                         |
|                                 |                                                                                                                                                                                                                                             |

SCHOLARONE™  
Manuscripts

Peer Review Only

1  
2  
3  
4  
5  
6 1 **Enteric *Salmonella* in humans and food in the Middle East and North Africa:**  
7 2 **Protocol of a systematic review**  
8

9 3 Karima Chaabna<sup>1,2\*</sup> and Walid Alali<sup>3</sup>  
10  
11 4

12 5  
13 6 1 Infectious Disease Epidemiology Group, Weill Cornell Medical College in Qatar, Cornell University,  
14 7 Doha, Qatar  
15

16 8 2 Department of Healthcare Policy and Research, Weill Cornell Medical College, Cornell University,  
17 9 New York, USA  
18

19 10 3 College of Public Health, Hamad bin Khalifa University, Doha, Qatar  
20

21 11 Karima Chaabna's email: chaabnak.epi@gmail.com  
22

23 12 Walid Alali's email: walali@qf.org.qa  
24

25 13 \*Corresponding author:  
26

27 14 Karima Chaabna  
28

29 15 Address: Institute for Population Health. Weill Cornell Medicine-Qatar P.O. Box 24144, Doha, Qatar.  
30

31 16 Telephone number: +(974) 4492-8936.  
32

33 17 E-mail: chaabnak.epi@gmail.com  
34

35 18 Registration: CRD42016046360  
36  
37  
38  
39  
40  
41  
42  
43  
44  
45  
46  
47  
48  
49  
50  
51  
52  
53  
54  
55  
56  
57  
58  
59  
60

## 1 **Abstract**

### 2 **Introduction**

3 Nontyphoidal *Salmonella* is considered one of the leading causes of foodborne disease worldwide. This  
4 protocol provides methods that will be used to synthesize available epidemiological data on nontyphoidal  
5 enteric *Salmonella* in humans and food in Middle East and North Africa (MENA) region; and to  
6 characterize the morbidity of human salmonellosis in this region.

### 7 **Methods and analysis**

8 A systematic review will be conducted based on the Cochrane Collaboration handbook and will be  
9 reported following the items outlined in the PRISMA guidelines. We will search PubMed, Embase, CAB  
10 Direct, and Global health Library (WHO) databases in order to identify relevant reports. Additionally, the  
11 literature search will be supplemented by checking references of the included reports and the identified  
12 reviews. Furthermore, we will hand-search conference proceedings and Ministry of health's website of  
13 each country of the MENA region. We will use comprehensive search criteria with no time and no  
14 language restrictions. We will extract data on report and study characteristics, biological assay  
15 characteristics, individuals' demographic characteristics, and on primary and secondary outcomes of  
16 interest. If appropriate, meta-analysis will be conducted in order to estimate pooled prevalence measures  
17 using DerSimonian and Laird random-effects models. We will conduct meta-regression analysis to  
18 explore the effect of study-level characteristics as potential sources of heterogeneity.

### 19 **Ethics and dissemination**

20 The results of the systematic review will be disseminated in a peer-reviewed journal and presented at  
21 relevant conferences.

### 22 **Trial registration number**

23 CRD42016046360

### 24 **Keywords**

25 Enteric *Salmonella*, Middle East and North Africa

26

## 1 Strengths and limitations of this study

- 2 • To the best of our knowledge, this is the first systematic review evaluating the epidemiology of  
3 nontyphoidal enteric *Salmonella* in humans and food in the countries of the Middle East and  
4 North Africa region.
- 5 • This systematic review will potentially inform policy makers in order to strengthen national  
6 foodborne disease surveillance and to improve food safety in this region.
- 7 • One of our limitations will be probably a high heterogeneity between studies related to sample  
8 size, populations, settings, study periods, and the use of different biological assays to ascertain the  
9 infection.

## 1 Introduction

2 Nontyphoidal *Salmonella* is considered one of the leading causes of foodborne disease worldwide. The  
3 World Health Organization (WHO) estimated that the annual median number of nontyphoidal  
4 salmonellosis was 78.7 million foodborne illnesses with over 59 thousand deaths <sup>1</sup>. As for the WHO  
5 defined Eastern Mediterranean Region, the median incidence rate of nontyphoidal salmonellosis was  
6 1,610 illnesses with 0.6 death, and disability adjusted life years (DALYS) was 54 per 100,000 persons;  
7 whereas, the median incidence rate in the WHO defined African Region is 896 illnesses with 1 death, and  
8 89 DALYS per 100,000 persons <sup>2</sup>.

9 Countries in the Middle East and North Africa (MENA) region share similar heritage, religion and  
10 language. However, the socioeconomic status, governance, growth and development, and health care  
11 system in MENA region differ widely. Although foodborne disease outbreaks have been frequently  
12 reported in MENA region, a rigorous reporting and monitoring system (i.e., active surveillance system) is  
13 lacking to quantify the incidence/prevalence of foodborne pathogens and disease. Nonetheless, published  
14 studies from the MENA region have reported data on foodborne disease morbidity in human populations.  
15 Furthermore, data on the prevalence of food contaminants have been revealed in MENA countries.  
16 Nontyphoidal *Salmonella* species are common cause of foodborne disease in the MENA region<sup>1</sup>.  
17 Moreover, *Salmonella* has been detected in an array of food products presented to consumers in the  
18 region. The number and quality of the studies differ substantially by country. To the best of our  
19 knowledge, there has been no published study that systematically reviewed, synthesized, and assessed the  
20 available data on nontyphoidal enteric *Salmonella* in humans and food in the MENA region. Synthesizing  
21 the data in addition to characterizing the morbidity of human salmonellosis in MENA will provide a  
22 rational basis for source attribution studies at regional and country level. Additionally, this study will  
23 inform policy maker in order to strengthen national foodborne disease surveillance, improve food safety,  
24 and prioritize food control intervention programs.

## 25 Objectives

26 The proposed systematic review will identify, synthesize, and assess the available data on nontyphoidal  
27 enteric *Salmonella* in humans and food in each country of the MENA region. Therefore, our review will  
28 address the following questions: 1) What is the nontyphoidal salmonellosis morbidity in human  
29 populations in MENA?, 2) What is the nontyphoidal *Salmonella* prevalence in food in MENA?, 3) What  
30 is the distribution of *Salmonella* serotypes in human populations and food?

## 1 **Methods and analysis**

2 This systematic review protocol was developed based on the Cochrane Collaboration handbook<sup>3</sup> and  
3 reported following the statement outlined by Preferred Reporting Items for Systematic Review and Meta-  
4 Analysis Protocols (PRISMA-P) 2015 statements<sup>4</sup>. PRISMA-P 2015 checklist<sup>5</sup> was completed and can  
5 be found in Table 1.

## 6 **Inclusion and exclusion criteria**

### 7 *Types of studies*

8 All reports meeting the inclusion criteria will be included if the study sample size is higher than ten. Case  
9 reports, case series, expert opinion, reviews, original articles reporting qualitative and experimental  
10 studies, editorials, commentaries, letters to editors, author replies, and newspaper articles will be  
11 excluded.

### 12 *Type of participants*

13 Included reports are those studying humans and food. Reports will be excluded if the studies were on  
14 enteric *Salmonella* in live food producing or domestic animals as well as in water, fomite, soil, or other  
15 environments.

### 16 *Types of exposures*

17 Included reports are those studying nontyphoidal enteric *Salmonella*. These reports need to present studies  
18 that used laboratory testing for *Salmonella* ascertainment. More precisely, in humans, the laboratory  
19 testing have to be conducted on stool samples; i.e., reports of studies based on clinical diagnosis without  
20 any laboratory tests on stool to confirm the causative agent will be excluded. Therefore, reports on  
21 nontyphoidal enteric *Salmonella* from gastro-intestinal tract infections will be included; while reports on  
22 respiratory, urinary tract, and bloodstream infections will be excluded. Additionally, studies on  
23 nontyphoidal enteric *Salmonella* cultured from cerebrospinal fluid will be excluded. Reports referring to  
24 nontyphoidal enteric *Salmonella* infection as *Salmonella* infection or as salmonellosis will be included;  
25 whereas, those referring to enteric *Salmonella* as typhoidal, paratyphoidal, or invasive nontyphoidal  
26 *Salmonella* infection (that is not foodborne or cause of gastro-intestinal tract infections) will be excluded.

## 27 **Types of outcomes**

28 Our primary outcomes are nontyphoidal enteric *Salmonella* morbidity (prevalence), serotype distribution,  
29 bacteria attributable mortality and all-cause mortality in human populations, hospitalization, and length of  
30 stay in hospital. Our secondary outcomes are enteric *Salmonella* prevalence and serotype distribution in  
31 food.

## 1 **Data sources and search strategy**

2 Our systematic review will be conducted based on the Cochrane Collaboration handbook <sup>3</sup> and will be  
3 reported following the items outlined in the Preferred Reporting Items for Systematic Reviews and Meta-  
4 Analyses (PRISMA) statement. We will search PubMed <sup>6</sup>, Embase <sup>7</sup>, CAB Direct <sup>8</sup>, and Global health  
5 Library (WHO) <sup>9</sup> databases in order to identify further relevant reports. In addition, the literature search  
6 will be supplemented by checking references of the included reports and the identified reviews.  
7 Furthermore, we will hand-search conference proceedings and Ministry of health's website of each  
8 country of the MENA region. We will use comprehensive search criteria with no time and no language  
9 restrictions. We will construct our search criteria using Boolean logic (OR and AND) to combine Medical  
10 Subject Headings (MeSH) terms and text words. Key search terms will include countries' names, MENA  
11 populations' names, and *Salmonella*. We will use WHO/EMR <sup>10</sup> definition of MENA region and we will  
12 complement this list with four countries whose official languages are Arabic <sup>11</sup> and that are cited in other  
13 definitions of MENA <sup>12-14</sup>. The reviewer team do not speak the official language of Cyprus <sup>11</sup> nor the  
14 media of instruction in its Universities and Colleges <sup>15</sup>; this will prevent us to identify grey literature such  
15 as reports from the ministry of health, journal articles and conference abstract published in these  
16 languages. As such, we decide to exclude this country. Our systematic review will include 24 countries,  
17 namely: Afghanistan, Algeria, Bahrain, Djibouti, Egypt, Iran, Iraq, Jordan, Kuwait, Lebanon, Libya,  
18 Morocco, Mauritania, Oman, Pakistan, Palestine, Qatar, Saudi Arabia, Somalia, Sudan, Syria, Tunisia,  
19 United Arab Emirates, and Yemen. The selected MENA countries have a total population of more than  
20 680 million people <sup>16</sup>.

## 21 **Study records**

### 22 *Selection process*

23 Identified references will be imported into a reference manager (Endnote <sup>17</sup>) where duplicate reports will  
24 be excluded. The title and abstract screening for relevance, followed by the full-text screening of the  
25 unique reports will be conducted by KC. This multi-level screening process will be checked by WA. Any  
26 disagreements will be resolved by discussion and consensus. Non-eligible reports will be excluded and  
27 the reasons for their exclusion will be recorded.

### 28 *Data collection process*

29 A piloted standardized form developed in Microsoft Excel 2010 <sup>18</sup> by KC and WA will be used for the  
30 extraction step. Extraction of relevant data will be done by KC and 25% of the data will be checked for  
31 correctness by WA.



## 1 **Data items**

2 We will extract data on report characteristics (authors, year of publication, title, among others), study  
3 characteristics (year of data collection, study site and design, sampling methodology, prevalence, number  
4 of positive cases, sample size, among others), biological assay characteristics, individuals' demographic  
5 characteristics (age, gender, among others), and on primary and secondary outcomes of interest.

## 6 **Risk of bias in individual studies**

7 Based on the Cochrane approach<sup>3</sup>, the risk of bias (ROB) assessment will be conducted at both the study-  
8 level and the outcome-level. Each study will be classified as having a low, high, or unclear ROB in each  
9 of the three quality domains, namely sampling methodology, infection ascertainment, and response rate.  
10 A ROB will be considered low if these three quality domains are probability-based, ascertainment by  
11 biological assays, or response rate is  $\geq 80\%$ , respectively. At outcome-level, a minimum sample size will  
12 be calculated using exact binomial confidence interval formula<sup>19</sup> in order to differentiate outcome  
13 measures with good precision. Sample size of studies considered as having good precision should be  
14 equal or higher than the minimum sample size defined in this protocol.

## 15 **Data synthesis**

16 We will report our systematic review following Preferred Reporting Items for PRISMA 2009 statements  
17<sup>20</sup> and PRISMA for Abstracts Checklist<sup>21</sup>. We will qualitatively synthesize the identified data on  
18 nontyphoidal enteric *Salmonella* in humans and food. These data will be stratified by country and  
19 according to the clinical status of the study populations:

- 20 1- Non-clinical populations in community settings: healthy populations, mainly food workers
- 21 2- Clinical populations: patients with diarrhea due to gastrointestinal pathogenic microbes

22 In addition, a third stratum will be created for the food category. According to the diversity of the  
23 identified population subgroups, we will decide if we also need to create subcategories in each stratum.

24 If data are appropriate for quantitative synthesis, data analyses will be conducted in R v.3.1.1.<sup>22</sup> using the  
25 *meta*<sup>23</sup> and *metafor*<sup>24</sup> packages. Using meta-analysis, we aim to estimate pooled prevalence of  
26 *Salmonella* in food (stratified by category: poultry, beef, and seafood, among others) and in human  
27 (stratified by type of population). Outcome measures will be pooled in all strata with at least three  
28 outcome measures included. Meta-regression will be used in order to assess heterogeneity across studies<sup>3</sup>  
29 related to sample size, populations, settings, study periods, and the use of different biological assays to  
30 ascertain the infection. Additionally, we will conduct sensitivity analysis restricted to studies at low ROB  
31 in order to explore the impact of high ROB study measures on the pooled estimates.

## Meta-bias

Regarding meta-bias assessment, we will use funnel plots in order to explore small-study effect on the pooled estimates<sup>25</sup>. Traditional funnel plots (log (odds proportion) vs. 1/standard error) are inaccurate for meta-analysis of proportion studies. Therefore, we will create funnel plots of log (odds proportion) against sample size<sup>26</sup>. In order to test the asymmetry of the funnel, we will perform Egger test<sup>25</sup> that is based on standard error as well as Peter test which is based on sample size<sup>26 27</sup>.

## Confidence in cumulative evidence

We will use a narrative justification for the quality of the evidence at the country-level. We will consider the quality of evidence being better in a country if at least one country-level study was conducted. This country-level study should have used standard methodology including probability-based sampling. Thus, we will categorize countries as having:

- No evidence: no data identified
- Poor evidence: poor quality of the outcome measures
- Limited evidence: the number of outcome measures is small but of reasonable quality
- Good evidence: the number of outcome measures is small but with good quality
- Conclusive evidence: enough outcome measures with good quality

## Discussion

To the best of our knowledge, this systematic review will be the first attempt to synthesize available data on nontyphoidal enteric *Salmonella* in humans and food in the countries of the MENA region; and to characterize the morbidity of human salmonellosis. This work will enable us to identify key pathogen control points that should be reinforced and those that need to be further assessed through country-level studies. Ultimately, this systematic review will provide rational basis for source attribution studies at both regional and country levels<sup>28</sup>. Additionally, this study will inform policy maker actions in order to strengthen national foodborne disease surveillance and to improve food safety and public health in MENA.

## Ethics and dissemination

Ethical approval will not be needed as in this systematic review, data used will not be individual patient data. Therefore, there will be no concerns about privacy. The findings will be disseminated via publication of a manuscript in a peer-reviewed journal and presented at relevant conferences.

1  
2  
3 **1 Author contributions:**  
4

5 2 KC and WA contributed to the conception of the study. The manuscript protocol was drafted by KC and  
6  
7 3 revised by WA. The search strategy was developed and will be conducted by both authors who will also  
8  
9 4 screen the potential reports, extract data, assess the risk of bias and perform the data synthesis. Both  
10  
11 5 authors approved the publication of the current protocol.

12  
13 **6 Funding statement**

14 7 This research received no specific grant from any funding agency in the public, commercial, or not-for-  
15  
16 8 profit sectors'.  
17  
18 9

19  
20  
21  
22  
23  
24  
25  
26  
27  
28  
29  
30  
31  
32  
33  
34  
35  
36  
37  
38  
39  
40  
41  
42  
43  
44  
45  
46  
47  
48  
49  
50  
51  
52  
53  
54  
55  
56  
57  
58  
59  
60

For peer review only

1  
2  
3  
4  
5  
6  
7  
8  
9  
10  
11  
12  
13  
14  
15  
16  
17  
18  
19  
20  
21  
22  
23  
24  
25  
26  
27  
28  
29  
30  
31  
32  
33  
34  
35  
36  
37  
38  
39  
40  
41  
42  
43  
44  
45  
46  
47  
48  
49  
1 Table 1: PRISMA-P (Preferred Reporting Items for Systematic review and Meta-Analysis Protocols) 2015 checklist

| Section and topic                 | Item<br>N <sub>0</sub> | Checklist items                                                                                                                                                                                | page           |
|-----------------------------------|------------------------|------------------------------------------------------------------------------------------------------------------------------------------------------------------------------------------------|----------------|
| <b>Administrative information</b> |                        |                                                                                                                                                                                                |                |
| Title                             |                        |                                                                                                                                                                                                |                |
| Identification                    | 1a                     | Identify the report as a protocol of a systematic review                                                                                                                                       | 1              |
| Update                            | 1b                     | If the protocol is for an update of a previous systematic review, identify                                                                                                                     | Not applicable |
| Registration                      | 2                      | If registered, provide the name of the registry (such PROSPERO) and registration number                                                                                                        | 1              |
| Authors:                          |                        |                                                                                                                                                                                                | 1              |
| Contact                           | 3a                     | Provide name, institutional, e-mail address of all protocol authors, provide physical mailing address of the corresponding author                                                              | 1              |
| Contributions                     | 3b                     | Describe contributions of protocol authors and identity the guarantor of the review                                                                                                            | 9              |
| Amendments                        | 4                      | If the protocol represents an amendment of a previously completed or published protocol, identify as such and list changes; otherwise state plan for documenting important protocol amendments | Not applicable |
| Support:                          |                        |                                                                                                                                                                                                |                |
| Sources                           | 5a                     | Indicate sources of financial or other support for the review                                                                                                                                  | 9              |
| Sponsor                           | 5b                     | Provide name for the review funder and/or sponsor                                                                                                                                              | 9              |
| Role of sponsor or funder         | 5c                     | Describe roles of funder(s), sponsor(s), if any, in developing the protocol                                                                                                                    | 9              |

**Introduction**

|            |   |                                                                                                                                                          |   |
|------------|---|----------------------------------------------------------------------------------------------------------------------------------------------------------|---|
| Rationale  | 6 | Describe the rationale for the review in the context of what is already known                                                                            | 4 |
| Objectives | 7 | Provide an explicit statement of the question(s) the review will address with reference to participants, interventions, comparators, and outcomes (PICO) | 4 |

**Methods**

|                             |     |                                                                                                                                                                                                                               |     |
|-----------------------------|-----|-------------------------------------------------------------------------------------------------------------------------------------------------------------------------------------------------------------------------------|-----|
| Eligibility criteria        | 8   | Specify the study characteristics (such as PICO, study design, setting, time frame) and report characteristics (such as years considered, language, publication status) to be used as criteria for eligibility for the review | 5   |
| Information sources         | 9   | Describe all intended information sources (such as electronic databases, contact with study authors, trial registers, or other grey literature sources) with planned dates of coverage                                        | 6   |
| Search strategy             | 10  | Present draft of search strategy to be used for at least one electronic databases, including planned limits, such that it could be repeated                                                                                   | 6   |
| Study records:              |     |                                                                                                                                                                                                                               |     |
| Data management             | 11a | Describe the mechanism(s) that will be used to manage records and data throughout the review                                                                                                                                  | 6-7 |
| Selection process           | 11b | State the process that will be used for selecting studies ( such as two independent reviewers) through each phase of the review ( that is, screening, eligibility, and inclusion in meta-analysis)                            | 6   |
| Data collection process     | 11c | Describe planned method of extracting data from reports (such as piloting forms, done independently, in duplicate), any processes for obtaining and confirming data from investigators                                        | 6   |
| Data items                  | 12  | List and define all variables for which data will be sought (such as PICO items, funding sources), any pre-planned data assumptions and simplifications                                                                       | 7   |
| Outcomes and prioritization | 13  | List and define all outcomes for which data will be sought, including prioritization of main and additional outcomes, with rationale                                                                                          | 5   |

|    |                     |     |                                                                                                      |   |
|----|---------------------|-----|------------------------------------------------------------------------------------------------------|---|
| 1  |                     |     |                                                                                                      |   |
| 2  |                     |     |                                                                                                      |   |
| 3  | Risk of bias in     | 141 | Describe anticipated methods for assessing risk of bias of individual studies, including whether     | 7 |
| 4  | individual studies  |     | this will be done at the outcome or study level, or both; state how this information will be used in |   |
| 5  |                     |     | data synthesis                                                                                       |   |
| 6  |                     |     |                                                                                                      |   |
| 7  | Data synthesis      | 15a | Describe criteria under which study data will be quantitatively synthesised                          | 7 |
| 8  |                     |     |                                                                                                      |   |
| 9  |                     | 15b | If data are appropriate for quantitative synthesis, describe planned summary measures, methods       |   |
| 10 |                     |     | of handling data and methods of combining data from studies, including any planned exploration       |   |
| 11 |                     |     | of consistency (such as I <sup>2</sup> , Kendall's $\tau$ )                                          |   |
| 12 |                     |     |                                                                                                      |   |
| 13 |                     | 15c | Describe any proposed additional analyses (such as sensitivity or subgroup analyses, meta-           |   |
| 14 |                     |     | regression)                                                                                          |   |
| 15 |                     | 15d | If quantitative synthesis is not appropriate, describe the type of summary planned                   |   |
| 16 |                     |     |                                                                                                      |   |
| 17 |                     |     |                                                                                                      |   |
| 18 |                     | 15d |                                                                                                      |   |
| 19 |                     |     |                                                                                                      |   |
| 20 | Meta-bias(es)       | 16  | Specify any planned assessment of meta-bias(es) (such as publication bias across studies,            | 8 |
| 21 |                     |     | selective reporting within studies)                                                                  |   |
| 22 |                     |     |                                                                                                      |   |
| 23 | Confidence in       | 17  | Describe how the strength of the body of evidence will be assessed (such as GRADE)                   | 8 |
| 24 | cumulative evidence |     |                                                                                                      |   |
| 25 |                     |     |                                                                                                      |   |
| 26 |                     |     |                                                                                                      |   |
| 27 |                     |     |                                                                                                      |   |
| 28 |                     |     |                                                                                                      |   |
| 29 |                     |     |                                                                                                      |   |
| 30 |                     |     |                                                                                                      |   |
| 31 |                     |     |                                                                                                      |   |
| 32 |                     |     |                                                                                                      |   |
| 33 |                     |     |                                                                                                      |   |
| 34 |                     |     |                                                                                                      |   |
| 35 |                     |     |                                                                                                      |   |
| 36 |                     |     |                                                                                                      |   |
| 37 |                     |     |                                                                                                      |   |
| 38 |                     |     |                                                                                                      |   |
| 39 |                     |     |                                                                                                      |   |
| 40 |                     |     |                                                                                                      |   |
| 41 |                     |     |                                                                                                      |   |
| 42 |                     |     |                                                                                                      |   |
| 43 |                     |     |                                                                                                      |   |
| 44 |                     |     |                                                                                                      |   |
| 45 |                     |     |                                                                                                      |   |
| 46 |                     |     |                                                                                                      |   |
| 47 |                     |     |                                                                                                      |   |
| 48 |                     |     |                                                                                                      |   |
| 49 |                     |     |                                                                                                      |   |

## Reference

1. Havelaar AH, Kirk MD, Torgerson PR, et al. World Health Organization Global Estimates and Regional Comparisons of the Burden of Foodborne Disease in 2010. *PLoS medicine* 2015;12(12):e1001923. doi: 10.1371/journal.pmed.1001923
2. Kirk MD, Pires SM, Black RE, et al. World Health Organization Estimates of the Global and Regional Disease Burden of 22 Foodborne Bacterial, Protozoal, and Viral Diseases, 2010: A Data Synthesis. *PLoS medicine* 2015;12(12):e1001921. doi: 10.1371/journal.pmed.1001921
3. Higgins JPT, Green S. *Cochrane Handbook for Systematic Reviews of Interventions* 2008.
4. Moher D, Shamseer L, Clarke M, et al. Preferred reporting items for systematic review and meta-analysis protocols (PRISMA-P) 2015 statement. *Systematic reviews* 2015;4:1. doi: 10.1186/2046-4053-4-1
5. Shamseer L, Moher D, Clarke M, et al. Preferred reporting items for systematic review and meta-analysis protocols (PRISMA-P) 2015: elaboration and explanation. *Bmj* 2015;349:g7647. doi: 10.1136/bmj.g7647
6. National institutes of Health. PubMed.gov US National Library of Medicine. Available at: <http://www.ncbi.nlm.nih.gov/pubmed>. Bethesda, USAN.D. [
7. Ovid Technologies i. Emabase New York, USA2016 [Available from: <http://ovidsp.tx.ovid.com/sp-3.21.1b/ovidweb.cgi?&S=GLEEFPGFJDDNDAFNCKMKGHCJCKEAA00&New+Database=Single%7c6> accessed February 15 2017.
8. CAB International. CAB Direct United Kingdom2016 [Available from: <https://www.cabdirect.org/> accessed December 25 2016.
9. World Health Organization. Global Health Library Geneva, SwitzerlandN.D. [Available from: <http://www.globalhealthlibrary.net/php/index.php> accessed January 1 2017.
10. World Health Organization. Country groupings: Subregional country groupings for the global assessment of disease burden: WHO; N.D. [Available from: [http://www.who.int/quantifying\\_ehimpacts/global/ebdcountrygroup/en/](http://www.who.int/quantifying_ehimpacts/global/ebdcountrygroup/en/) accessed January 25 2017.
11. The Central Intelligence Agency. The World Factbook: The Central Intelligence Agency; 2017 [Available from: <https://www.cia.gov/library/publications/the-world-factbook/> accessed 26 January 2017.
12. The World Bank. Data: Wold Bank Country and Lending Groups: The World Bank; 2017 [Available from: <https://datahelpdesk.worldbank.org/knowledgebase/articles/906519-world-bank-country-and-lending-groups> accessed July 25 2017.
13. UNAIDS. UNAIDS Middle East & North Africa: UNAIDS; 2017 [Available from: <http://www.unaidsmena.org/> accessed 01/25 2017.
14. Institute for Health Metrics and Evaluation GBD Compare | Viz Hub: University of Washington; 2017 [Available from: <http://vizhub.healthdata.org/gbd-compare/> accessed February 15 2017.

- 1 15. Conseil de L'Europe. Language Education Policy Profile: Cyprus: Conseil de  
2 L'Europe, N.D.
- 3 16. United Nations. Total Population - Both Sexes. De facto population in a country, area  
4 or region as of 1 July of the year indicated. Figures are presented in thousands.  
5 World Population Prospects: The 2015 Revision 2016 [Available from:  
6 <https://esa.un.org/unpd/wpp/Download/Standard/Population/> accessed January 1  
7 2017.
- 8 17. Thomson Reuter. Endnote X7 2016 [
- 9 18. Microsoft. Microsoft Excel 2010 2010
- 10 19. Clopper C, Pearson E. The use of confidence or fiducial limits illustrated in the case  
11 of the binomial. *Biometricka* 1934;26:404-13.
- 12 20. Moher D, Liberati A, Tetzlaff J, et al. Preferred reporting items for systematic  
13 reviews and meta-analyses: the PRISMA statement. *Journal of clinical*  
14 *epidemiology* 2009;62(10):1006-12. doi: 10.1016/j.jclinepi.2009.06.005  
15 [published Online First: 2009/07/28]
- 16 21. Beller EM, Glasziou PP, Altman DG, et al. PRISMA for Abstracts: reporting  
17 systematic reviews in journal and conference abstracts. *PLoS medicine*  
18 2013;10(4):e1001419. doi: 10.1371/journal.pmed.1001419
- 19 22. The R Project for Statistical Computing. R-3.3.1 for Windows (32/64 bit): The R  
20 Foundation.; 2016 [Available from: <https://cran.r-project.org/bin/windows/base/>  
21 accessed August 30.
- 22 23. Schwarzer G. Meta package 2016 [Available from: [https://cran.r-](https://cran.r-project.org/web/packages/meta/meta.pdf)  
23 [project.org/web/packages/meta/meta.pdf](https://cran.r-project.org/web/packages/meta/meta.pdf) accessed August 30 2016.
- 24 24. Schwarzer G. Metafor package 2015 [Available from: [https://cran.r-](https://cran.r-project.org/web/packages/metafor/metafor.pdf)  
25 [project.org/web/packages/metafor/metafor.pdf](https://cran.r-project.org/web/packages/metafor/metafor.pdf) accessed August 30 2016.
- 26 25. Sterne JA, Egger M. Funnel plots for detecting bias in meta-analysis: guidelines on  
27 choice of axis. *Journal of clinical epidemiology* 2001;54(10):1046-55. [published  
28 Online First: 2001/09/29]
- 29 26. Hunter JP, Saratzis A, Sutton AJ, et al. In meta-analyses of proportion studies, funnel  
30 plots were found to be an inaccurate method of assessing publication bias. *Journal*  
31 *of clinical epidemiology* 2014;67(8):897-903. doi: 10.1016/j.jclinepi.2014.03.003  
32 [published Online First: 2014/05/06]
- 33 27. Moreno SG, Sutton AJ, Ades AE, et al. Assessment of regression-based methods to  
34 adjust for publication bias through a comprehensive simulation study. *BMC*  
35 *medical research methodology* 2009;9:2. doi: 10.1186/1471-2288-9-2 [published  
36 Online First: 2009/01/14]
- 37 28. Ahlstrom C, Muellner P, Spencer SE, et al. Inferring source attribution from a  
38 multiyear multisource data set of Salmonella in Minnesota. *Zoonoses Public*  
39 *Health* 2017 doi: 10.1111/zph.12351



Table 1: PRISMA-P (Preferred Reporting Items for Systematic review and Meta-Analysis Protocols) 2015 checklist

| Section and topic                 | Item           | Checklist items                                                                                                                                                                                                               | page           |
|-----------------------------------|----------------|-------------------------------------------------------------------------------------------------------------------------------------------------------------------------------------------------------------------------------|----------------|
|                                   | N <sub>0</sub> |                                                                                                                                                                                                                               |                |
| <b>Administrative information</b> |                |                                                                                                                                                                                                                               |                |
| Title                             |                |                                                                                                                                                                                                                               |                |
| Identification                    | 1a             | Identify the report as a protocol of a systematic review                                                                                                                                                                      | 1              |
| Update                            | 1b             | If the protocol is for an update of a previous systematic review, identify                                                                                                                                                    | Not applicable |
| Registration                      | 2              | If registered, provide the name of the registry (such PROSPERO) and registration number                                                                                                                                       | 1              |
| Authors:                          |                |                                                                                                                                                                                                                               | 1              |
| Contact                           | 3a             | Provide name, institutional, e-mail address of all protocol authors, provide physical mailing address of the corresponding author                                                                                             | 1              |
| Contributions                     | 3b             | Describe contributions of protocol authors and identity the guarantor of the review                                                                                                                                           | 9              |
| Amendments                        | 4              | If the protocol represents an amendment of a previously completed or published protocol, identify as such and list changes; otherwise state plan for documenting important protocol amendments                                | Not applicable |
| Support:                          |                |                                                                                                                                                                                                                               |                |
| Sources                           | 5a             | Indicate sources of financial or other support for the review                                                                                                                                                                 | 9              |
| Sponsor                           | 5b             | Provide name for the review funder and/or sponsor                                                                                                                                                                             | 9              |
| Role of sponsor or funder         | 5c             | Describe roles of funder(s), sponsor(s), if any, in developing the protocol                                                                                                                                                   | 9              |
| <b>Introduction</b>               |                |                                                                                                                                                                                                                               |                |
| Rationale                         | 6              | Describe the rationale for the review in the context of what is already known                                                                                                                                                 | 4              |
| Objectives                        | 7              | Provide an explicit statement of the question(s) the review will address with reference to participants, interventions, comparators, and outcomes (PICO)                                                                      | 4              |
| <b>Methods</b>                    |                |                                                                                                                                                                                                                               |                |
| Eligibility criteria              | 8              | Specify the study characteristics (such as PICO, study design, setting, time frame) and report characteristics (such as years considered, language, publication status) to be used as criteria for eligibility for the review | 5              |
| Information sources               | 9              | Describe all intended information sources (such as electronic databases, contact with study authors, trial registers, or other grey literature sources) with planned dates of coverage                                        | 6              |
| Search strategy                   | 10             | Present draft of search strategy to be used for at least one electronic databases, including planned limits, such that it could be repeated                                                                                   | 6              |
| Study records:                    |                |                                                                                                                                                                                                                               |                |
| Data management                   | 11a            | Describe the mechanism(s) that will be used to manage records and data throughout the review                                                                                                                                  | 6-7            |
| Selection process                 | 11b            | State the process that will be used for selecting studies ( such as two independent reviewers)                                                                                                                                | 6              |

|    |                         |     |                                                                                                                                                                                              |   |
|----|-------------------------|-----|----------------------------------------------------------------------------------------------------------------------------------------------------------------------------------------------|---|
| 1  |                         |     |                                                                                                                                                                                              |   |
| 2  |                         |     |                                                                                                                                                                                              |   |
| 3  |                         |     |                                                                                                                                                                                              |   |
| 4  | Data collection process | 11c | through each phase of the review ( that is, screening, eligibility, and inclusion in meta-analysis)<br>Describe planned method of extracting data from reports (such as piloting forms, done | 6 |
| 5  |                         |     | independently, in duplicate), any processes for obtaining and confirming data from investigators                                                                                             |   |
| 6  | Data items              | 12  | List and define all variables for which data will be sought (such as PICO items, funding sources),                                                                                           | 7 |
| 7  |                         |     | any pre-planned data assumptions and simplifications                                                                                                                                         |   |
| 8  | Outcomes and            | 13  | List and define all outcomes for which data will be sought, including prioritization of main and                                                                                             | 5 |
| 9  | prioritization          |     | additional outcomes, with rationale                                                                                                                                                          |   |
| 10 | Risk of bias in         | 141 | Describe anticipated methods for assessing risk of bias of individual studies, including whether                                                                                             | 7 |
| 11 | individual studies      |     | this will be done at the outcome or study level, or both; state how this information will be used in                                                                                         |   |
| 12 |                         |     | data synthesis                                                                                                                                                                               |   |
| 13 | Data synthesis          | 15a | Describe criteria under which study data will be quantitatively synthesised                                                                                                                  | 7 |
| 14 |                         | 15b | If data are appropriate for quantitative synthesis, describe planned summary measures, methods                                                                                               |   |
| 15 |                         |     | of handling data and methods of combining data from studies, including any planned exploration                                                                                               |   |
| 16 |                         |     | of consistency (such as I <sup>2</sup> , Kendall's $\tau$ )                                                                                                                                  |   |
| 17 |                         | 15c | 15c Describe any proposed additional analyses (such as sensitivity or subgroup analyses, meta-                                                                                               |   |
| 18 |                         |     | regression)                                                                                                                                                                                  |   |
| 19 |                         | 15d | 15d If quantitative synthesis is not appropriate, describe the type of summary planned                                                                                                       |   |
| 20 | Meta-bias(es)           | 16  | Specify any planned assessment of meta-bias(es) (such as publication bias across studies,                                                                                                    | 8 |
| 21 |                         |     | selective reporting within studies)                                                                                                                                                          |   |
| 22 | Confidence in           | 17  | Describe how the strength of the body of evidence will be assessed (such as GRADE)                                                                                                           | 8 |
| 23 | cumulative evidence     |     |                                                                                                                                                                                              |   |
| 24 |                         |     |                                                                                                                                                                                              |   |
| 25 |                         |     |                                                                                                                                                                                              |   |
| 26 |                         |     |                                                                                                                                                                                              |   |
| 27 |                         |     |                                                                                                                                                                                              |   |
| 28 |                         |     |                                                                                                                                                                                              |   |
| 29 |                         |     |                                                                                                                                                                                              |   |
| 30 |                         |     |                                                                                                                                                                                              |   |
| 31 |                         |     |                                                                                                                                                                                              |   |
| 32 |                         |     |                                                                                                                                                                                              |   |
| 33 |                         |     |                                                                                                                                                                                              |   |
| 34 |                         |     |                                                                                                                                                                                              |   |
| 35 |                         |     |                                                                                                                                                                                              |   |
| 36 |                         |     |                                                                                                                                                                                              |   |
| 37 |                         |     |                                                                                                                                                                                              |   |
| 38 |                         |     |                                                                                                                                                                                              |   |
| 39 |                         |     |                                                                                                                                                                                              |   |
| 40 |                         |     |                                                                                                                                                                                              |   |
| 41 |                         |     |                                                                                                                                                                                              |   |
| 42 |                         |     |                                                                                                                                                                                              |   |
| 43 |                         |     |                                                                                                                                                                                              |   |
| 44 |                         |     |                                                                                                                                                                                              |   |
| 45 |                         |     |                                                                                                                                                                                              |   |
| 46 |                         |     |                                                                                                                                                                                              |   |
| 47 |                         |     |                                                                                                                                                                                              |   |
| 48 |                         |     |                                                                                                                                                                                              |   |
| 49 |                         |     |                                                                                                                                                                                              |   |

# BMJ Open

## Enteric Salmonella in humans and food in the Middle East and North Africa: Protocol of a systematic review

|                                 |                                                                                                                                                                                                                                             |
|---------------------------------|---------------------------------------------------------------------------------------------------------------------------------------------------------------------------------------------------------------------------------------------|
| Journal:                        | <i>BMJ Open</i>                                                                                                                                                                                                                             |
| Manuscript ID                   | bmjopen-2017-017399.R2                                                                                                                                                                                                                      |
| Article Type:                   | Protocol                                                                                                                                                                                                                                    |
| Date Submitted by the Author:   | 06-Jun-2017                                                                                                                                                                                                                                 |
| Complete List of Authors:       | Chaabna, Karima; Weill Cornell Medical College – Qatar, Infectious Disease Epidemiology Group; Weill Cornell Medicine, Department of Healthcare Policy and Research<br>Alali, Walid; College of Public Health, Hamad bin Khalifa University |
| <b>Primary Subject Heading</b>: | Epidemiology                                                                                                                                                                                                                                |
| Secondary Subject Heading:      | Infectious diseases                                                                                                                                                                                                                         |
| Keywords:                       | Salmonella, Middle East, North Africa, food born disease                                                                                                                                                                                    |
|                                 |                                                                                                                                                                                                                                             |

SCHOLARONE™  
Manuscripts

1  
2  
3  
4  
5  
6 1 **Enteric *Salmonella* in humans and food in the Middle East and North Africa:**  
7 2 **Protocol of a systematic review**

8  
9 3 Karima Chaabna<sup>1,2\*</sup> and Walid Alali<sup>3</sup>

10  
11 4  
12 5  
13 6 1 Infectious Disease Epidemiology Group, Weill Cornell Medical College in Qatar, Cornell University,  
14 7 Doha, Qatar

15 8 2 Department of Healthcare Policy and Research, Weill Cornell Medical College, Cornell University,  
16 9 New York, USA

17  
18 10 3 College of Public Health, Hamad bin Khalifa University, Doha, Qatar

19  
20 11 Karima Chaabna's email: chaabnak.epi@gmail.com

21  
22 12 Walid Alali's email: walali@qf.org.qa

23  
24 13 \*Corresponding author:

25  
26 14 Karima Chaabna

27  
28 15 Address: Institute for Population Health. Weill Cornell Medicine-Qatar P.O. Box 24144, Doha, Qatar.

29  
30 16 Telephone number: +(974) 4492-8936.

31  
32 17 E-mail: chaabnak.epi@gmail.com

33  
34 18 Registration: CRD42016046360

35  
36  
37  
38  
39  
40  
41  
42  
43  
44  
45  
46  
47  
48  
49  
50  
51  
52  
53  
54  
55  
56  
57  
58  
59  
60

## 1 **Abstract**

### 2 **Introduction**

3 Nontyphoidal *Salmonella* is considered one of the leading causes of foodborne disease worldwide. This  
4 protocol provides methods that will be used to synthesize available epidemiological data on nontyphoidal  
5 enteric *Salmonella* in humans and food in Middle East and North Africa (MENA) region; and to  
6 characterize the morbidity of human salmonellosis in this region.

### 7 **Methods and analysis**

8 A systematic review will be conducted based on the Cochrane Collaboration handbook and will be  
9 reported following the items outlined in the PRISMA guidelines. We will search PubMed, Embase, CAB  
10 Direct, and Global health Library (WHO) databases in order to identify relevant reports. Additionally, the  
11 literature search will be supplemented by checking references of the included reports and the identified  
12 reviews. Furthermore, we will hand-search conference proceedings and Ministry of health's website of  
13 each country of the MENA region. We will use comprehensive search criteria with no time and no  
14 language restrictions. We will extract data on report and study characteristics, biological assay  
15 characteristics, individuals' demographic characteristics, and on primary and secondary outcomes of  
16 interest. If appropriate, meta-analysis will be conducted in order to estimate pooled prevalence measures  
17 using DerSimonian and Laird random-effects models. We will conduct meta-regression analysis to  
18 explore the effect of study-level characteristics as potential sources of heterogeneity.

### 19 **Ethics and dissemination**

20 The results of the systematic review will be disseminated in a peer-reviewed journal and presented at  
21 relevant conferences.

### 22 **Trial registration number**

23 CRD42016046360

### 24 **Keywords**

25 Enteric *Salmonella*, Middle East and North Africa  
26

## 1 Strengths and limitations of this study

- 2 • To the best of our knowledge, this is the first systematic review evaluating the epidemiology of  
3 nontyphoidal enteric *Salmonella* in humans and food in the countries of the Middle East and  
4 North Africa region.
- 5 • This systematic review will potentially inform policy makers in order to strengthen national  
6 foodborne disease surveillance and to improve food safety in this region.
- 7 • One of our limitations will be probably a high heterogeneity between studies related to sample  
8 size, populations, settings, study periods, and the use of different biological assays to ascertain the  
9 infection.

## 1 Introduction

2 Nontyphoidal *Salmonella* is considered one of the leading causes of foodborne disease worldwide. The  
3 World Health Organization (WHO) estimated that the annual median number of nontyphoidal  
4 salmonellosis was 78.7 million foodborne illnesses with over 59 thousand deaths <sup>1</sup>. As for the WHO  
5 defined Eastern Mediterranean Region, the median incidence rate of nontyphoidal salmonellosis was  
6 1,610 illnesses with 0.6 death, and disability adjusted life years (DALYS) was 54 per 100,000 persons;  
7 whereas, the median incidence rate in the WHO defined African Region is 896 illnesses with 1 death, and  
8 89 DALYS per 100,000 persons <sup>2</sup>.

9 Countries in the Middle East and North Africa (MENA) region share similar heritage, religion and  
10 language. However, the socioeconomic status, governance, growth and development, and health care  
11 system in MENA region differ widely. Although foodborne disease outbreaks have been frequently  
12 reported in MENA region, a rigorous reporting and monitoring system (i.e., active surveillance system) is  
13 lacking to quantify the incidence/prevalence of foodborne pathogens and disease. Nonetheless, published  
14 studies from the MENA region have reported data on foodborne disease morbidity in human populations.  
15 Furthermore, data on the prevalence of food contaminants have been revealed in MENA countries.  
16 Nontyphoidal *Salmonella* species are common cause of foodborne disease in the MENA region<sup>1</sup>.  
17 Moreover, *Salmonella* has been detected in an array of food products presented to consumers in the  
18 region. The number and quality of the studies differ substantially by country. To the best of our  
19 knowledge, there has been no published study that systematically reviewed, synthesized, and assessed the  
20 available data on nontyphoidal enteric *Salmonella* in humans and food in the MENA region. Synthesizing  
21 the data in addition to characterizing the morbidity of human salmonellosis in MENA will provide a  
22 rational basis for source attribution studies at regional and country level. Additionally, this study will  
23 inform policy maker in order to strengthen national foodborne disease surveillance, improve food safety,  
24 and prioritize food control intervention programs.

## 25 Objectives

26 The proposed systematic review will identify, synthesize, and assess the available data on nontyphoidal  
27 enteric *Salmonella* in humans and food in each country of the MENA region. Therefore, our review will  
28 address the following questions: 1) What is the nontyphoidal salmonellosis morbidity in human  
29 populations in MENA?, 2) What is the nontyphoidal *Salmonella* prevalence in food in MENA?, 3) What  
30 is the distribution of *Salmonella* serotypes in human populations and food?

## 1 **Methods and analysis**

2 This systematic review protocol was developed based on the Cochrane Collaboration handbook<sup>3</sup> and  
3 reported following the statement outlined by Preferred Reporting Items for Systematic Review and Meta-  
4 Analysis Protocols (PRISMA-P) 2015 statements<sup>4</sup>. PRISMA-P 2015 checklist<sup>5</sup> was completed and can  
5 be found in the Research checklist.

## 6 **Inclusion and exclusion criteria**

### 7 *Types of studies*

8 All reports meeting the inclusion criteria will be included if the study sample size is higher than ten. Case  
9 reports, case series, expert opinion, reviews, original articles reporting qualitative and experimental  
10 studies, editorials, commentaries, letters to editors, author replies, and newspaper articles will be  
11 excluded.

### 12 *Type of participants*

13 Included reports are those studying humans and food. Reports will be excluded if the studies were on  
14 enteric *Salmonella* in live food producing or domestic animals as well as in water, fomite, soil, or other  
15 environments.

### 16 *Types of exposures*

17 Included reports are those studying nontyphoidal enteric *Salmonella*. These reports need to present studies  
18 that used laboratory testing for *Salmonella* ascertainment. More precisely, in humans, the laboratory  
19 testing have to be conducted on stool samples; i.e., reports of studies based on clinical diagnosis without  
20 any laboratory tests on stool to confirm the causative agent will be excluded. Therefore, reports on  
21 nontyphoidal enteric *Salmonella* from gastro-intestinal tract infections will be included; while reports on  
22 respiratory, urinary tract, and bloodstream infections will be excluded. Additionally, studies on  
23 nontyphoidal enteric *Salmonella* cultured from cerebrospinal fluid will be excluded. Reports referring to  
24 nontyphoidal enteric *Salmonella* infection as *Salmonella* infection or as salmonellosis will be included;  
25 whereas, those referring to enteric *Salmonella* as typhoidal, paratyphoidal, or invasive nontyphoidal  
26 *Salmonella* infection (that is not foodborne or cause of gastro-intestinal tract infections) will be excluded.

## 27 **Types of outcomes**

28 Our primary outcomes are nontyphoidal enteric *Salmonella* morbidity (prevalence), serotype distribution,  
29 bacteria attributable mortality and all-cause mortality in human populations, hospitalization, and length of  
30 stay in hospital. Our secondary outcomes are enteric *Salmonella* prevalence and serotype distribution in  
31 food.



## 1 **Data sources and search strategy**

2 Our systematic review will be conducted based on the Cochrane Collaboration handbook<sup>3</sup> and will be  
3 reported following the items outlined in the Preferred Reporting Items for Systematic Reviews and Meta-  
4 Analyses (PRISMA) statement. We will search PubMed<sup>6</sup>, Embase<sup>7</sup>, CAB Direct<sup>8</sup>, and Global health  
5 Library (WHO)<sup>9</sup> databases in order to identify further relevant reports (supplementary file 1). In addition,  
6 the literature search will be supplemented by checking references of the included reports and the  
7 identified reviews. Furthermore, we will hand-search conference proceedings and Ministry of health's  
8 website of each country of the MENA region. We will use comprehensive search criteria with no time and  
9 no language restrictions. We will construct our search criteria using Boolean logic (OR and AND) to  
10 combine Medical Subject Headings (MeSH) terms and text words. Key search terms will include  
11 countries' names, MENA populations' names, and *Salmonella*. We will use WHO/EMR<sup>10</sup> definition of  
12 MENA region and we will complement this list with four countries whose official languages are Arabic<sup>11</sup>  
13 and that are cited in other definitions of MENA<sup>12-14</sup>. The reviewer team do not speak the official language  
14 of Cyprus<sup>11</sup> nor the media of instruction in its Universities and Colleges<sup>15</sup>; this will prevent us to identify  
15 grey literature such as reports from the ministry of health, journal articles and conference abstract  
16 published in these languages. As such, we decide to exclude this country. Our systematic review will  
17 include 24 countries, namely: Afghanistan, Algeria, Bahrain, Djibouti, Egypt, Iran, Iraq, Jordan, Kuwait,  
18 Lebanon, Libya, Morocco, Mauritania, Oman, Pakistan, Palestine, Qatar, Saudi Arabia, Somalia, Sudan,  
19 Syria, Tunisia, United Arab Emirates, and Yemen. The selected MENA countries have a total population  
20 of more than 680 million people<sup>16</sup>.

## 21 **Study records**

### 22 *Selection process*

23 Identified references will be imported into a reference manager (Endnote<sup>17</sup>) where duplicate reports will  
24 be excluded. The title and abstract screening for relevance, followed by the full-text screening of the  
25 unique reports will be conducted by KC. This multi-level screening process will be checked by WA. Any  
26 disagreements will be resolved by discussion and consensus. Non-eligible reports will be excluded and  
27 the reasons for their exclusion will be recorded.

### 28 *Data collection process*

29 A piloted standardized form developed in Microsoft Excel 2010<sup>18</sup> by KC and WA will be used for the  
30 extraction step. Extraction of relevant data will be done by KC and 25% of the data will be checked for  
31 correctness by WA.

## 1 **Data items**

2 We will extract data on report characteristics (authors, year of publication, title, among others), study  
3 characteristics (year of data collection, study site and design, sampling methodology, prevalence, number  
4 of positive cases, sample size, among others), biological assay characteristics, individuals' demographic  
5 characteristics (age, gender, among others), and on primary and secondary outcomes of interest.

## 6 **Risk of bias in individual studies**

7 Based on the Cochrane approach<sup>3</sup>, the risk of bias (ROB) assessment will be conducted at both the study-  
8 level and the outcome-level. Each study will be classified as having a low, high, or unclear ROB in each  
9 of the three quality domains, namely sampling methodology, infection ascertainment, and response rate.  
10 A ROB will be considered low if these three quality domains are probability-based, ascertainment by  
11 biological assays, or response rate is  $\geq 80\%$ , respectively. At outcome-level, a minimum sample size will  
12 be calculated using exact binomial confidence interval formula<sup>19</sup> in order to differentiate outcome  
13 measures with good precision. Sample size of studies considered as having good precision should be  
14 equal or higher than the minimum sample size defined in this protocol.

## 15 **Data synthesis**

16 We will report our systematic review following Preferred Reporting Items for PRISMA 2009 statements  
17<sup>20</sup> and PRISMA for Abstracts Checklist<sup>21</sup>. We will qualitatively synthesize the identified data on  
18 nontyphoidal enteric *Salmonella* in humans and food. These data will be stratified by country and  
19 according to the clinical status of the study populations:

- 20 1- Non-clinical populations in community settings: healthy populations, mainly food workers
- 21 2- Clinical populations: patients with diarrhea due to gastrointestinal pathogenic microbes

22 In addition, a third stratum will be created for the food category. According to the diversity of the  
23 identified population subgroups, we will decide if we also need to create subcategories in each stratum.

24 If data are appropriate for quantitative synthesis, data analyses will be conducted in R v.3.1.1.<sup>22</sup> using the  
25 *meta*<sup>23</sup> and *metafor*<sup>24</sup> packages. Using meta-analysis, we aim to estimate pooled prevalence of  
26 *Salmonella* in food (stratified by category: poultry, beef, and seafood, among others) and in human  
27 (stratified by type of population). Outcome measures will be pooled in all strata with at least three  
28 outcome measures included. Meta-regression will be used in order to assess heterogeneity across studies<sup>3</sup>  
29 related to sample size, populations, settings, study periods, and the use of different biological assays to  
30 ascertain the infection. Additionally, we will conduct sensitivity analysis restricted to studies at low ROB  
31 in order to explore the impact of high ROB study measures on the pooled estimates.

## Meta-bias

Regarding meta-bias assessment, we will use funnel plots in order to explore small-study effect on the pooled estimates<sup>25</sup>. Traditional funnel plots (log (odds proportion) vs. 1/standard error) are inaccurate for meta-analysis of proportion studies. Therefore, we will create funnel plots of log (odds proportion) against sample size<sup>26</sup>. In order to test the asymmetry of the funnel, we will perform Egger test<sup>25</sup> that is based on standard error as well as Peter test which is based on sample size<sup>26 27</sup>.

## Confidence in cumulative evidence

We will use a narrative justification for the quality of the evidence at the country-level. We will consider the quality of evidence being better in a country if at least one country-level study was conducted. This country-level study should have used standard methodology including probability-based sampling. Thus, we will categorize countries as having:

- No evidence: no data identified
- Poor evidence: poor quality of the outcome measures
- Limited evidence: the number of outcome measures is small but of reasonable quality
- Good evidence: the number of outcome measures is small but with good quality
- Conclusive evidence: enough outcome measures with good quality

## Discussion

To the best of our knowledge, this systematic review will be the first attempt to synthesize available data on nontyphoidal enteric *Salmonella* in humans and food in the countries of the MENA region; and to characterize the morbidity of human salmonellosis. This work will enable us to identify key pathogen control points that should be reinforced and those that need to be further assessed through country-level studies. Ultimately, this systematic review will provide rational basis for source attribution studies at both regional and country levels<sup>28</sup>. Additionally, this study will inform policy maker actions in order to strengthen national foodborne disease surveillance and to improve food safety and public health in MENA.

## Ethics and dissemination

Ethical approval will not be needed as in this systematic review, data used will not be individual patient data. Therefore, there will be no concerns about privacy. The findings will be disseminated via publication of a manuscript in a peer-reviewed journal and presented at relevant conferences.

1  
2  
3 **1 Author contributions:**  
4

5 2 KC and WA contributed to the conception of the study. The manuscript protocol was drafted by KC and  
6  
7 3 revised by WA. The search strategy was developed and will be conducted by both authors who will also  
8  
9 4 screen the potential reports, extract data, assess the risk of bias and perform the data synthesis. Both  
10  
11 5 authors approved the publication of the current protocol.

12  
13 **6 Funding statement**

14 7 This research received no specific grant from any funding agency in the public, commercial, or not-for-  
15  
16 8 profit sectors'.  
17  
18 9

19  
20  
21  
22  
23  
24  
25  
26  
27  
28  
29  
30  
31  
32  
33  
34  
35  
36  
37  
38  
39  
40  
41  
42  
43  
44  
45  
46  
47  
48  
49  
50  
51  
52  
53  
54  
55  
56  
57  
58  
59  
60

For peer review only

## Reference

1. Havelaar AH, Kirk MD, Torgerson PR, et al. World Health Organization Global Estimates and Regional Comparisons of the Burden of Foodborne Disease in 2010. *PLoS medicine* 2015;12(12):e1001923. doi: 10.1371/journal.pmed.1001923
2. Kirk MD, Pires SM, Black RE, et al. World Health Organization Estimates of the Global and Regional Disease Burden of 22 Foodborne Bacterial, Protozoal, and Viral Diseases, 2010: A Data Synthesis. *PLoS medicine* 2015;12(12):e1001921. doi: 10.1371/journal.pmed.1001921
3. Higgins JPT, Green S. Cochrane Handbook for Systematic Reviews of Interventions 2008.
4. Moher D, Shamseer L, Clarke M, et al. Preferred reporting items for systematic review and meta-analysis protocols (PRISMA-P) 2015 statement. *Systematic reviews* 2015;4:1. doi: 10.1186/2046-4053-4-1
5. Shamseer L, Moher D, Clarke M, et al. Preferred reporting items for systematic review and meta-analysis protocols (PRISMA-P) 2015: elaboration and explanation. *Bmj* 2015;349:g7647. doi: 10.1136/bmj.g7647
6. National institutes of Health. PubMed.gov US National Library of Medicine. Available at: <http://www.ncbi.nlm.nih.gov/pubmed>. Bethesda, USAN.D. [
7. Ovid Technologies i. Emabase New York, USA2016 [Available from: <http://ovidsp.tx.ovid.com/sp-3.21.1b/ovidweb.cgi?&S=GLEEFPGFJDDNDAFNCIKMHGJCJKEAA00&New+Database=Single%7c6> accessed February 15 2017.
8. CAB International. CAB Direct United Kingdom2016 [Available from: <https://www.cabdirect.org/> accessed December 25 2016.
9. World Health Organization. Global Health Library Geneva, SwitzerlandN.D. [Available from: <http://www.globalhealthlibrary.net/php/index.php> accessed January 1 2017.
10. World Health Organization. Country groupings: Subregional country groupings for the global assessment of disease burden: WHO; N.D. [Available from: [http://www.who.int/quantifying\\_ehimpacts/global/ebdcountgroup/en/](http://www.who.int/quantifying_ehimpacts/global/ebdcountgroup/en/) accessed January 25 2017.
11. The Central Intelligence Agency. The World Factbook: The Central Intelligence Agency; 2017 [Available from: <https://www.cia.gov/library/publications/the-world-factbook/> accessed 26 January 2017.
12. The World Bank. Data: Wold Bank Country and Lending Groups: The World Bank; 2017 [Available from: <https://datahelpdesk.worldbank.org/knowledgebase/articles/906519-world-bank-country-and-lending-groups> accessed July 25 2017.
13. UNAIDS. UNAIDS Middle East & North Africa: UNAIDS; 2017 [Available from: <http://www.unaidsmena.org/> accessed 01/25 2017.
14. Institute for Health Metrics and Evaluation GBD Compare | Viz Hub: University of Washington; 2017 [Available from: <http://vizhub.healthdata.org/gbd-compare/> accessed February 15 2017.

15. Conseil de L'Europe. Language Education Policy Profile: Cyprus: Conseil de L'Europe, N.D.
16. United Nations. Total Population - Both Sexes. De facto population in a country, area or region as of 1 July of the year indicated. Figures are presented in thousands. World Population Prospects: The 2015 Revision 2016 [Available from: <https://esa.un.org/unpd/wpp/Download/Standard/Population/> accessed January 1 2017.
17. Thomson Reuter. Endnote X7 2016 [
18. Microsoft. Microsoft Excel 2010 2010
19. Clopper C, Pearson E. The use of confidence or fiducial limits illustrated in the case of the binomial. *Biometricka* 1934;26:404-13.
20. Moher D, Liberati A, Tetzlaff J, et al. Preferred reporting items for systematic reviews and meta-analyses: the PRISMA statement. *Journal of clinical epidemiology* 2009;62(10):1006-12. doi: 10.1016/j.jclinepi.2009.06.005 [published Online First: 2009/07/28]
21. Beller EM, Glasziou PP, Altman DG, et al. PRISMA for Abstracts: reporting systematic reviews in journal and conference abstracts. *PLoS medicine* 2013;10(4):e1001419. doi: 10.1371/journal.pmed.1001419
22. The R Project for Statistical Computing. R-3.3.1 for Windows (32/64 bit): The R Foundation.; 2016 [Available from: <https://cran.r-project.org/bin/windows/base/> accessed August 30.
23. Schwarzer G. Meta package 2016 [Available from: <https://cran.r-project.org/web/packages/meta/meta.pdf> accessed August 30 2016.
24. Schwarzer G. Metafor package 2015 [Available from: <https://cran.r-project.org/web/packages/metafor/metafor.pdf> accessed August 30 2016.
25. Sterne JA, Egger M. Funnel plots for detecting bias in meta-analysis: guidelines on choice of axis. *Journal of clinical epidemiology* 2001;54(10):1046-55. [published Online First: 2001/09/29]
26. Hunter JP, Saratzis A, Sutton AJ, et al. In meta-analyses of proportion studies, funnel plots were found to be an inaccurate method of assessing publication bias. *Journal of clinical epidemiology* 2014;67(8):897-903. doi: 10.1016/j.jclinepi.2014.03.003 [published Online First: 2014/05/06]
27. Moreno SG, Sutton AJ, Ades AE, et al. Assessment of regression-based methods to adjust for publication bias through a comprehensive simulation study. *BMC medical research methodology* 2009;9:2. doi: 10.1186/1471-2288-9-2 [published Online First: 2009/01/14]
28. Ahlstrom C, Muellner P, Spencer SE, et al. Inferring source attribution from a multiyear multisource data set of Salmonella in Minnesota. *Zoonoses Public Health* 2017 doi: 10.1111/zph.12351

**Search criteria - PubMed**

("Salmonella" [Mesh] OR "Salmonella" [Text] OR "salmonellosis"[Text])

AND

("Qatar" [Mesh] OR "Bahrain"[Mesh] OR "Oman" [Mesh] OR "Saudi Arabia" [Mesh] OR "Kuwait"  
[Mesh] OR "United Arab Emirates" [Mesh] OR "UAE" [Text] OR "U.A.E" [Text] OR "Emirat\*" [Text]  
OR "Qatar\*" [Text] OR "Oman\*" [Text] OR "Saudi Arabia" [Text] OR "Saudi\*" [Text] OR "Kuwait\*" [Text]  
OR "United Arab Emirates" [Text] OR "Bahrain\*" [Text] OR "Gulf" [Text] OR "Yemen" [Mesh] OR  
"Yemen\*" [Text] OR

"Jordan" [Mesh] OR "Lebanon" [Mesh] OR "Syria" [Mesh] OR "Iraq" [Mesh] OR "Palestine" [Mesh]  
OR "Jordan" [Text] OR "Lebanon" [Text] OR "Syria" [Text] OR "Iraq" [Text] OR "Palestine" [Text] OR  
"Jordan\*" [Text] OR "Lebanon" [Text] OR "Lebanese\*" OR "Syria\*" [Text] OR "Iraq\*" [Text] OR  
"Palestine" [Text] OR "West Bank" [Text] OR "Gaza" [Text] OR "Palestinian\*" [Text] OR

"Africa,Northern" [Mesh] OR "Algeria" [Mesh] OR "Libya" [Mesh] OR "Egypt" [Mesh] OR "Morocco"  
[Mesh] OR "Tunisia" [Mesh] or "Mauritania" [Mesh] OR "Algeria" [Text] or "Libya" [Text] OR  
"Morocco" [Text] OR "Tunisia" [Text] OR "Mauritania" [Text] OR "Egypt" [Text] OR "Algeria\*" [Text]  
OR "Libya\*" [Text] OR "Moroccan\*" [Text] OR "Tunis\*" [Text] OR "Mauritania\*" [Text] OR  
"North Africa" [Text] OR "North-Africa" [Text] OR ("Africa" [Text] AND "Northern" [Text]) OR  
"Northern Africa" [Text] OR "Maghreb" [Text] OR "Maghrib" [Text] OR

"Djibouti" [Mesh] OR "Somalia" [Mesh] OR "Sudan" [Mesh] OR "Africa, Eastern" [Mesh] OR  
"Djibouti\*" [Text] OR "Somalia\*" [Text] OR "Sudan\*" [Text] OR "East\* Africa\*" [Text] OR

"Afghanistan" [Mesh] OR "Afghan\*" [Text] OR "Pakistan" [Mesh] OR Pakistan\* [text] OR "Iran" [Mesh]  
OR Iran\* [text] OR "persia" [Mesh] OR Persia\* [text])

Table 1: PRISMA-P (Preferred Reporting Items for Systematic review and Meta-Analysis Protocols) 2015 checklist

| Section and topic                 | Item           | Checklist items                                                                                                                                                                                                               | page           |
|-----------------------------------|----------------|-------------------------------------------------------------------------------------------------------------------------------------------------------------------------------------------------------------------------------|----------------|
|                                   | N <sub>0</sub> |                                                                                                                                                                                                                               |                |
| <b>Administrative information</b> |                |                                                                                                                                                                                                                               |                |
| Title                             |                |                                                                                                                                                                                                                               |                |
| Identification                    | 1a             | Identify the report as a protocol of a systematic review                                                                                                                                                                      | 1              |
| Update                            | 1b             | If the protocol is for an update of a previous systematic review, identify                                                                                                                                                    | Not applicable |
| Registration                      | 2              | If registered, provide the name of the registry (such PROSPERO) and registration number                                                                                                                                       | 1              |
| Authors:                          |                |                                                                                                                                                                                                                               | 1              |
| Contact                           | 3a             | Provide name, institutional, e-mail address of all protocol authors, provide physical mailing address of the corresponding author                                                                                             | 1              |
| Contributions                     | 3b             | Describe contributions of protocol authors and identity the guarantor of the review                                                                                                                                           | 9              |
| Amendments                        | 4              | If the protocol represents an amendment of a previously completed or published protocol, identify as such and list changes; otherwise state plan for documenting important protocol amendments                                | Not applicable |
| Support:                          |                |                                                                                                                                                                                                                               |                |
| Sources                           | 5a             | Indicate sources of financial or other support for the review                                                                                                                                                                 | 9              |
| Sponsor                           | 5b             | Provide name for the review funder and/or sponsor                                                                                                                                                                             | 9              |
| Role of sponsor or funder         | 5c             | Describe roles of funder(s), sponsor(s), if any, in developing the protocol                                                                                                                                                   | 9              |
| <b>Introduction</b>               |                |                                                                                                                                                                                                                               |                |
| Rationale                         | 6              | Describe the rationale for the review in the context of what is already known                                                                                                                                                 | 4              |
| Objectives                        | 7              | Provide an explicit statement of the question(s) the review will address with reference to participants, interventions, comparators, and outcomes (PICO)                                                                      | 4              |
| <b>Methods</b>                    |                |                                                                                                                                                                                                                               |                |
| Eligibility criteria              | 8              | Specify the study characteristics (such as PICO, study design, setting, time frame) and report characteristics (such as years considered, language, publication status) to be used as criteria for eligibility for the review | 5              |
| Information sources               | 9              | Describe all intended information sources (such as electronic databases, contact with study authors, trial registers, or other grey literature sources) with planned dates of coverage                                        | 6              |
| Search strategy                   | 10             | Present draft of search strategy to be used for at least one electronic databases, including planned limits, such that it could be repeated                                                                                   | 6              |
| Study records:                    |                |                                                                                                                                                                                                                               |                |
| Data management                   | 11a            | Describe the mechanism(s) that will be used to manage records and data throughout the review                                                                                                                                  | 6-7            |
| Selection process                 | 11b            | State the process that will be used for selecting studies ( such as two independent reviewers)                                                                                                                                | 6              |



|    |                         |     |                                                                                                        |
|----|-------------------------|-----|--------------------------------------------------------------------------------------------------------|
| 1  |                         |     |                                                                                                        |
| 2  |                         |     |                                                                                                        |
| 3  |                         |     |                                                                                                        |
| 4  | Data collection process | 11c | through each phase of the review ( that is, screening, eligibility, and inclusion in meta-analysis) 6  |
| 5  |                         |     |                                                                                                        |
| 6  | Data items              | 12  | Describe planned method of extracting data from reports (such as piloting forms, done 7                |
| 7  |                         |     |                                                                                                        |
| 8  |                         |     |                                                                                                        |
| 9  | Outcomes and            | 13  | List and define all variables for which data will be sought (such as PICO items, funding sources), 7   |
| 10 | prioritization          |     | any pre-planned data assumptions and simplifications                                                   |
| 11 | Risk of bias in         | 141 | List and define all outcomes for which data will be sought, including prioritization of main and 5     |
| 12 | individual studies      |     | additional outcomes, with rationale                                                                    |
| 13 |                         |     |                                                                                                        |
| 14 | Data synthesis          | 15a | Describe anticipated methods for assessing risk of bias of individual studies, including whether 7     |
| 15 |                         | 15b | this will be done at the outcome or study level, or both; state how this information will be used in 7 |
| 16 |                         |     | data synthesis                                                                                         |
| 17 |                         |     |                                                                                                        |
| 18 |                         | 15c | Describe criteria under which study data will be quantitatively synthesised 7                          |
| 19 |                         |     |                                                                                                        |
| 20 |                         |     |                                                                                                        |
| 21 |                         | 15d | If data are appropriate for quantitative synthesis, describe planned summary measures, methods 7       |
| 22 | Meta-bias(es)           | 16  | of handling data and methods of combining data from studies, including any planned exploration 7       |
| 23 |                         |     | of consistency (such as I <sup>2</sup> , Kendall's $\tau$ )                                            |
| 24 | Confidence in           | 17  | 15c Describe any proposed additional analyses (such as sensitivity or subgroup analyses, meta- 7       |
| 25 | cumulative evidence     |     | regression)                                                                                            |
| 26 |                         |     |                                                                                                        |
| 27 |                         |     |                                                                                                        |
| 28 |                         |     |                                                                                                        |
| 29 |                         |     |                                                                                                        |
| 30 |                         |     |                                                                                                        |
| 31 |                         |     |                                                                                                        |
| 32 |                         |     |                                                                                                        |
| 33 |                         |     |                                                                                                        |
| 34 |                         |     |                                                                                                        |
| 35 |                         |     |                                                                                                        |
| 36 |                         |     |                                                                                                        |
| 37 |                         |     |                                                                                                        |
| 38 |                         |     |                                                                                                        |
| 39 |                         |     |                                                                                                        |
| 40 |                         |     |                                                                                                        |
| 41 |                         |     |                                                                                                        |
| 42 |                         |     |                                                                                                        |
| 43 |                         |     |                                                                                                        |
| 44 |                         |     |                                                                                                        |
| 45 |                         |     |                                                                                                        |
| 46 |                         |     |                                                                                                        |
| 47 |                         |     |                                                                                                        |
| 48 |                         |     |                                                                                                        |
| 49 |                         |     |                                                                                                        |
