# Supplementary material for: Enteric Salmonella in humans and food in the Middle East and North Africa: protocol of a systematic review
Source: PubMed Central journal article supplement — BMJ Open. 2017 Jul 28;7(7):e017399. doi: 10.1136/bmjopen-2017-017399 (PMC5642666; doi:10.1136/bmjopen-2017-017399), 2017-07-28
Supplement: bmjopen-2017-017399supp001.pdf [file bmjopen-2017-017399supp001.pdf]

## Search criteria - PubMed

("Salmonella" [Mesh] OR "Salmonella" [Text] OR "salmonellosis"[Text])

AND

("Qatar" [Mesh] OR "Bahrain"[Mesh] OR "Oman" [Mesh] OR "Saudi Arabia" [Mesh] OR "Kuwait"  
[Mesh] OR "United Arab Emirates" [Mesh] OR "UAE" [Text] OR "U.A.E" [Text] OR "Emirat\*" [Text]  
OR "Qatar\*" [Text] OR "Oman\*" [Text] OR "Saudi Arabia" [Text] OR "Saudi\*" [Text] OR "Kuwait\*" [Text]  
OR "United Arab Emirates" [Text] OR "Bahrain\*" [Text] OR "Gulf" [Text] "Yemen" [Mesh] OR  
"Yemen\*" [Text] OR

"Jordan" [Mesh] OR "Lebanon" [Mesh] OR "Syria" [Mesh] OR "Iraq" [Mesh] OR "Palestine" [Mesh]  
OR "Jordan" [Text] OR "Lebanon" [Text] OR "Syria" [Text] OR "Iraq" [Text] OR "Palestine" [Text] OR  
"Jordan\*" [Text] OR "Lebanon" [Text] OR "Lebanese\*" OR "Syria\*" [Text] OR "Iraq\*" [Text] OR  
"Palestine" [Text] OR "West Bank" [Text] OR "Gaza" [Text] OR "Palestinian\*" [Text] OR

"Africa,Northern" [Mesh] OR "Algeria" [Mesh] OR "Libya" [Mesh] OR "Egypt" [Mesh] OR "Morocco"  
[Mesh] OR "Tunisia" [Mesh] or "Mauritania" [Mesh] OR "Algeria" [Text] or "Libya" [Text] OR  
"Morocco" [Text] OR "Tunisia" [Text] OR "Mauritania" [Text] OR "Egypt" [Text] OR "Algeria\*" [Text]  
OR "Libya\*" [Text] OR "Moroccan\*" [Text] OR "Tunis\*" [Text] OR "Mauritania\*" [Text] OR  
"North Africa" [Text] OR "North-Africa" [Text] OR ("Africa" [Text] AND "Northern" [Text]) OR  
"Northern Africa" [Text] OR "Maghreb" [Text] OR "Maghrib" [Text] OR

"Djibouti" [Mesh] OR "Somalia" [Mesh] OR "Sudan" [Mesh] OR "Africa, Eastern" [Mesh] OR  
"Djibouti\*" [Text] OR "Somalia\*" [Text] OR "Sudan\*" [Text] OR "East\* Africa\*" [Text] OR

"Afghanistan" [Mesh] OR "Afghan\*" [Text] OR "Pakistan" [Mesh] OR Pakistan\* [text] OR "Iran" [Mesh]  
OR Iran\* [text] OR "persia" [Mesh] OR Persia\* [text])
